1 **VASH1-SVBP and VASH2-SVBP generate different detyrosination profiles on microtubules**

2

3

4 Sacnicte Ramirez-Rios<sup>1\*</sup>, Sung Ryul Choi<sup>2\*</sup>, Chadni Sanyal<sup>1\*</sup>, Thorsten Blum<sup>2</sup>, Christophe Bosc<sup>1</sup>, Fatma  
5 Krichen<sup>1</sup>, Eric Denarier<sup>1</sup>, Jean-Marc Soleilhac<sup>1</sup>, Béatrice Blot<sup>1</sup>, Carsten Janke<sup>3,4</sup>, Virginie Stoppin-Mellet<sup>1</sup>,  
6 Maria M. Magiera<sup>3,4</sup>, Isabelle Arnal<sup>1</sup>, Michel O. Steinmetz<sup>2,5§</sup>, Marie-Jo Moutin<sup>1§</sup>

7

8

9 <sup>1</sup>Univ. Grenoble Alpes, Inserm, U1216, CNRS, CEA, Grenoble Institut Neurosciences, 38000 Grenoble,  
10 France

11 <sup>2</sup>Laboratory of Biomolecular Research, Division of Biology and Chemistry, Paul Scherrer Institut, 5232  
12 Villigen PSI, Switzerland

13 <sup>3</sup>Institut Curie, Université PSL, CNRS UMR3348, 91401 Orsay, France

14 <sup>4</sup>Université Paris-Saclay, CNRS UMR3348, 91401 Orsay, France.

15 <sup>5</sup>Biozentrum, University of Basel, 4056 Basel, Switzerland

16

17 \* These authors contributed equally

18 § Correspondence: [moutinm@univ-grenoble-alpes.fr](mailto:moutinm@univ-grenoble-alpes.fr); [michel.steinmetz@psi.ch](mailto:michel.steinmetz@psi.ch)

19

20 **Short title**

21 VASHs generate distinct detyrosinated profiles

## 22 **SUMMARY**

23 VASH1-SVBP and VASH2-SVBP produce global and local detyrosination patterns of microtubule  
24 lattices, respectively. These activities rely on the interplay between the N- and C-terminal disordered  
25 regions of the enzymes, which determine their differential molecular mechanism of action.

26

## 27 **ABSTRACT**

28 The detyrosination/tyrosination cycle of  $\alpha$ -tubulin is critical for proper cell functioning. VASH1-SVBP  
29 and VASH2-SVBP are ubiquitous enzyme complexes involved in microtubule detyrosination. However,  
30 little is known about their mode of action. Here, we show in reconstituted systems and in cells that  
31 VASH1-SVBP and VASH2-SVBP drive global and local detyrosination of microtubules, respectively. We  
32 solved the cryo-electron microscopy structure of human VASH2-SVBP bound to microtubules,  
33 revealing a different microtubule-binding configuration of its central catalytic region compared to  
34 VASH1-SVBP. We further show that the divergent mode of detyrosination between the two enzymes  
35 is correlated with the microtubule-binding properties of their disordered N- and C-terminal regions.  
36 Specifically, the N-terminal region is responsible for a significantly longer residence time of VASH2-  
37 SVBP on microtubules compared to VASH1-SVBP. We suggest that this VASH domain is critical for  
38 microtubule-detachment and diffusion of VASH-SVBP enzymes on the lattice. Together, our results  
39 suggest a mechanism by which these enzymes could generate distinct microtubule subpopulations and  
40 confined areas of detyrosinated lattices to drive various microtubule-based cellular functions.

41

## 42 **KEY WORDS**

43 Microtubule, tubulin, detyrosination, tyrosination, vasohibin, VASH, SVBP

44

## 45 **GRAPHICAL ABSTRACT**

46 Schematic representation of divergent molecular mechanisms of action of VASH-SVBP detyrosination  
47 complexes.

## 48 INTRODUCTION

49

50 Microtubules are key eukaryotic cytoskeletal elements that are regulated by the tubulin code.  
51 This code involves the differential expression of  $\alpha$ - and  $\beta$ -tubulin isoforms and their post-translational  
52 modifications (reviewed in (Janke and Magiera, 2020)). A prominent tubulin post-translational  
53 modification is the cyclic removal and re-addition of the C-terminal tyrosine residue of  $\alpha$ -tubulin. This  
54 evolutionary conserved cycle, referred to as the “detyrosination/tyrosination cycle”, was shown to be  
55 crucial for cell mitosis and differentiation; it is also a key player in the development and functioning of  
56 the brain and the heart ((Chen et al., 2018; Erck et al., 2005), reviewed in (Lopes and Maiato, 2020;  
57 Moutin et al., 2021; Sanyal et al., 2021)). Accordingly, dysfunctions of the detyrosination/tyrosination  
58 cycle lead to cancer, brain disease, and heart failure in humans ((Chen et al., 2020; Lafanechere et al.,  
59 1998; Peris et al., 2022; Schuldt et al., 2021) reviewed in (Lopes and Maiato, 2020; Sanyal et al., 2021)).  
60 The known “readers” of the tubulin tyrosine signal emerging from the cycle are kinesin motor and CAP-  
61 Gly proteins (reviewed in (Sanyal et al., 2021; Steinmetz and Akhmanova, 2008)). The activity of the  
62 detyrosination/tyrosination cycle regulates cargo trafficking in cells by tuning the microtubule binding  
63 of specific kinesins and the dynein-dynactin complex ((Dunn et al., 2008; Nirschl et al., 2016), reviewed  
64 in (Moutin et al., 2021)). The cycle also modulates tubulin interactions with regulators of microtubule  
65 stability, such as kinesin 13 and CLIP-170 (Chen et al., 2021; Peris et al., 2006; Peris et al., 2009). This  
66 modification is thus intimately linked to microtubule dynamics, where the detyrosination signal  
67 represents a marker of microtubule stability.

68 The detyrosination/tyrosination cycle of  $\alpha$ -tubulin involves at least four enzymes including the tubulin  
69 tyrosine ligase (TTL, (Ersfeld et al., 1993)) and the three recently discovered detyrosinases comprising  
70 the two enzymatic complexes composed of a vasohibin (VASH1 or VASH2) and a small vasohibin-  
71 binding protein (SVBP) (Aillaud et al., 2017; Nieuwenhuis et al., 2017), and MATCAP (microtubule  
72 associated tubulin carboxypeptidase (Landskron et al., 2022)). TTL represents the “writer” of the  
73 tyrosine signal, while vasohibins and MATCAP are the “erasers”. SVBP acts as a chaperone and a co-  
74 factor for VASH1 and VASH2, which are specific tyrosine/phenylalanine carboxypeptidases (Aillaud et  
75 al., 2017; Nieuwenhuis et al., 2017). Mammalian VASH1 and VASH2 proteins share more than 50%  
76 overall sequence identity. They belong to the transglutaminase-like cysteine protease superfamily  
77 (Sanchez-Pulido and Ponting, 2016) and harbor a Cys–His–Leu catalytic amino acid residue triad  
78 conserved among species (Adamopoulos et al., 2019; Wang et al., 2019). Crystal structures of VASH1-  
79 SVBP and VASH2-SVBP complexes at high resolution allowed to determine the global organization of  
80 the central catalytic regions of the VASHs (also called core domains), which are their most homologous  
81 domains ((Adamopoulos et al., 2019; Li et al., 2019; Liao et al., 2019; Liu et al., 2019; Wang et al., 2019;

82 Zhou et al., 2019), reviewed in (Sanyal et al., 2021). These domains form a folded, globular structure  
83 enclosing the C-terminal region of SVBP. The N- and C-terminal regions of VASHs are less well  
84 conserved and are assumed to be disordered as underlined by the lack of structural information in all  
85 published structures of VASH-SVBP complexes to date (Adamopoulos et al., 2019; Li et al., 2019; Liao  
86 et al., 2019; Liu et al., 2019; Wang et al., 2019; Zhou et al., 2019).

87 VASH-SVBP complexes are known to preferentially de-tyrosinate microtubule-lattice incorporated  $\alpha$ -  
88 tubulin (Aillaud et al., 2017). We have previously shown that the VASH2-SVBP complex binds  
89 microtubules with a 1:1 stoichiometry of VASH2-SVBP: $\alpha\beta$ -tubulin heterodimer and with an equilibrium  
90 dissociation constant in the low micromolar range (Wang et al., 2019). Mutating the catalytic cysteine  
91 residue Cys158 of VASH2 resulted in an enzymatically inactive VASH2 version that was unable to  
92 de-tyrosinate  $\alpha$ -tubulin, yet retaining the ability to co-localize with microtubules *in vitro* and in cells.  
93 We further identified positively charged VASH2 surface residues located in close proximity to the  
94 tyrosine-binding groove. Mutating these VASH2 residues decreased the de-tyrosination activity of the  
95 enzyme but did not completely abrogate microtubule binding *in vitro* and in cells, leading us to suspect  
96 that additional contact sites between VASHs and microtubules remained to be identified. In a recent  
97 work, cryo-electron microscopy (cryo-EM) was used to analyze the structure of VASH1-SVBP bound to  
98 microtubules. The authors showed that the core domain of VASH1 forms specific contacts with the  
99 folded parts of  $\alpha$ -tubulin (Li et al., 2020). However, as for the crystal structures obtained on the  
100 isolated, free enzyme complexes, they did not resolve the flanking regions of the VASH1 core domain,  
101 again demonstrating that the N- and C-terminal regions of VASHs are disordered and flexible.

102 VASH proteins are ubiquitously expressed but at different basal levels, transcripts of VASH1 being in  
103 general much higher represented (around 10-times) than transcripts of VASH2 (see the Human Protein  
104 Atlas project portal). In cells, de-tyrosination can occur on microtubules for many purposes and in  
105 several places (for review see (Roll-Mecak, 2019)), and the precise cellular role of each VASH-SVBP  
106 complex remains to be understood. VASH1-SVBP was identified as a primary tubulin de-tyrosinase in  
107 neurons and cardiomyocytes (Aillaud et al., 2017; Chen et al., 2020); however, VASH2-SVBP seems to  
108 act in cardiac cells as well (Yu et al., 2021). Thus, although a large amount of structural information has  
109 been obtained, the mechanism of action of VASH-SVBP enzyme complexes remain poorly understood.  
110 Here, combining single-molecule total internal reflection microscopy (TIRF) assays and cryo-EM, we  
111 depicted the molecular basis of the interaction of VASH1-SVBP and VASH2-SVBP with microtubules in  
112 relationship with their de-tyrosination activities. We showed that VASH1-SVBP generates global  
113 de-tyrosination of microtubule while VASH2-SVBP leads to local modifications both *in vitro* and in cells.  
114 The *in vitro* results obtained with several truncated mutants unveil crucial roles of the disordered N-  
115 and C-terminal regions in differentially regulating VASHs' interactions with microtubules and hence  
116 their activities. We reveal that the N-terminal regions, which are highly divergent between the two

117 VASHs, contribute to the difference in the enzymes' ability to diffuse on the microtubule lattice. Our  
118 data further suggest that the disparity in functioning of the two VASH-SVBP enzymes contributes to  
119 the generation of different patterns of detyrosinated microtubules and thus to microtubule  
120 subpopulations having distinct roles within cells.

121

## 122 RESULTS

123

### 124 VASH1 and VASH2 drive global and local microtubule detyrosination, respectively.

125 We first set up experimental conditions for which both the detyrosinating activity as well as the  
126 interaction with microtubules of VASH-SVBP complexes could be studied in parallel using  
127 immunofluorescence and TIRF microscopy, respectively. We generated constructs encoding the active  
128 full-length human VASH1 or VASH2 tagged with sfGFP at their N-termini and myc-6His at their C-  
129 termini. These constructs, together with the plasmid encoding the human SVBP fused to myc and FLAG  
130 tags at the C-terminus, were used to prepare full-length sfGFP-VASH1/2-SVBP complexes (V1\_FL and  
131 V2\_FL; [Figure S1AB](#)). We immobilized Taxol-stabilized microtubules enriched in tyrosinated HeLa  
132 tubulin (Tyr-MTs, containing 80 % of tyrosinated-tubulin, see Materials and Methods and [Figure S1C](#))  
133 on the surface of TIRF chambers as previously described (Stoppin-Mellet et al., 2020). Different media  
134 were tested in order to find experimental conditions where single molecules of the two enzyme  
135 complexes associated with microtubules. In BRB40 (40 mM PIPES-KOH at pH 6.8, 1 mM MgCl<sub>2</sub>, 1 mM  
136 EGTA) supplemented with 50 mM KCl, both enzyme complexes were fully soluble, and showed activity  
137 and binding events at 50 pM protein concentration, allowing to carry out a comparative study.

138 We first tested the activity of VASH1-SVBP and VASH2-SVBP in vitro using immunofluorescence ([Figure](#)  
139 [1 A-C](#)). Active versions of the two enzyme complexes (V1\_FL and V2\_FL) were incubated with Taxol-  
140 stabilized microtubules enriched in tyrosinated HeLa tubulin (Tyr-MTs) for 30 min. Both complexes led  
141 to a decrease of tyrosinated and a rise of detyrosinated microtubules ([Figure 1A](#)). Quantification of  
142 tyrosination and detyrosination levels showed that the changes were significantly larger for VASH1-  
143 SVBP than for VASH2-SVBP ([Figure 1B](#)). Interestingly, while the VASH1-SVBP complex induced a global  
144 microtubule detyrosination, VASH2-SVBP induced the formation of local areas of modifications of the  
145 microtubule lattice ([Figure 1AC](#)). Extensive regions of microtubules remained unmodified upon  
146 incubation with VASH2-SVBP over a 30 min period, which was not the case for VASH1-SVBP. In order  
147 to avoid a contribution of the fusion tags present in both the VASHs on their behavior, we tested  
148 enzymatic complexes with no tags on the VASHs and only a 6xHis tag at the N-terminus of SVBP. GFP-  
149 untagged proteins behaved similarly to their tagged counterparts: The VASH1-SVBP complex induced  
150 global detyrosination while VASH2-SVBP led to spots of detyrosination ([Figure S2A-D](#)).

151 Together, these results show that VASH1-SVBP or VASH2-SVBP effectively detyrosinates microtubules  
152 in vitro, however, in a different manner.

153

#### 154 **Difference in the interaction of VASH1-SVBP and VASH2-SVBP with microtubules.**

155 In order to understand the molecular mechanisms involved in the distinct detyrosination patterns, we  
156 monitored the interaction of the full-length VASH1-SVBP and VASH2-SVBP enzyme complexes (V1\_FL  
157 and V2\_FL) with Taxol-stabilized microtubules enriched in tyrosinated HeLa tubulin (Tyr-MTs) in BRB40  
158 supplemented with 50 mM KCL. We also examined the microtubule-interacting behavior of  
159 catalytically inactive enzyme complexes containing a Cys169Ala mutation in VASH1 (deadV1\_FL) or a  
160 Cys158Ala mutation in VASH2 (deadV2\_FL) (Aillaud et al., 2017; Wang et al., 2019). Interestingly, as  
161 shown in representative kymographs, the binding behavior of the two enzyme complexes on  
162 microtubules was very different (Figure 1D). Whereas both active and dead versions of VASH1-SVBP  
163 exhibited short and frequent binding events, active and dead versions of VASH2-SVBP bound less  
164 frequently and for much longer times on microtubules (Videos S1 and S2). As illustrated in Figure 1E,  
165 the local activity of VASH2-SVBP was correlated with poor covering of microtubules by this enzyme  
166 complex in TIRF experiments carried out under the same conditions. In contrast, microtubule covering  
167 by VASH1-SVBP enzymes was high (75% and 82% covering for V1\_FL and deadV1\_FL, respectively,  
168 versus 25% and 13 % covering for V2\_FL and deadV2\_FL, respectively).

169 We next analyzed the binding parameters (residence-time, binding frequency, diffusion) of the enzyme  
170 complexes on microtubule lattices in these experimental conditions (Figure 1F-H and Table 1). Within  
171 30 min after the addition of the enzyme complex, the residence-time distribution of VASH1-SVBP on  
172 microtubules was monoexponential with a mean residence-time ( $\tau$ ) of 0.5 and 1.0 s for the active and  
173 dead enzyme versions, respectively. The mean residence-time of full-length VASH2-SVBP was  
174 estimated higher than 11 s for the active version and higher than 14.6 s for the dead version, and thus  
175 at least 15- to 22-times higher than the residence-time of VASH1-SVBP (Figure 1F). A precise  
176 determination of the residence time for VASH2-SVBP was not possible in the experimental buffer  
177 conditions used to study both complexes side by side. Indeed, most VASH2-SVBP molecules were  
178 already attached to microtubules at the beginning of the TIRF movies and single molecule traces  
179 disappeared during movie acquisition due to quenching of the sfGFP fluorophore (see Materials and  
180 Methods for details). As illustrated in Figure 1G, VASH2-SVBP displayed a 6- to 10-times lower binding  
181 frequency than VASH1-SVBP (13.0 events/min. $\mu\text{m}.\text{nM}$  of V2-FL and 13.9 events/min. $\mu\text{m}.\text{nM}$  of  
182 deadV2-FL to be compared to 80.8 events/min. $\mu\text{m}.\text{nM}$  of V1\_FL and 132.2 events/min. $\mu\text{m}.\text{nM}$  of  
183 deadV1\_FL). Both enzymes diffused along the microtubule lattice, with VASH2-SVBP diffusing more  
184 slowly than VASH1-SVBP (1.8 and 1.9  $\mu\text{m}.\text{sec}^{-1}$  for V1\_FL and deadV1\_FL, respectively to be compared  
185 to 1.4 and 1.0  $\mu\text{m}.\text{sec}^{-1}$  for V2\_FL and deadV2\_FL, respectively, Figure 1H).

186 As the binding of microtubule-associated proteins to microtubules often involves electrostatic  
187 attractive interactions, we tested whether an increase in ionic strength affects the interaction of VASH-  
188 SVBP with microtubules. This significantly decreased the run length of both enzyme complexes on  
189 microtubules (Figure 2A-C and Table 1), and allowed to determine the residence-time for VASH2-SVBP  
190 binding (Figure 2C and Table 1D). Because it does not alter the evaluation of residence time and allows  
191 better visibility of traces on microtubules, the concentration of VASH1-SVBP was increased when using  
192 high ionic strength buffers. Despite reducing the residence time, VASH2-SVBP still stayed much longer  
193 on microtubules than VASH1-SVBP (Table 1C,  $\tau = 0.2$  s for V1\_FL versus  $\tau = 3.9$  s for V2\_FL in BRB80  
194 supplemented with 50 mM KCl, which represents more than 80 mM increase in ionic strength  
195 compared to BRB40 supplemented with 50 mM KCl). We next assayed the impact of ionic strength on  
196 the enzymatic activity by immunofluorescence. Quantifications of the tyrosinated tubulin signal of  
197 images from experiments performed in varying buffers demonstrated that, like the binding behavior,  
198 the enzymatic activity of the two VASH-SVBP complexes was salt dependent: increasing the ionic  
199 strength led to a significant reduction of the enzymatic activity (Figure 2D).  
200 Together, these results clearly highlight the different binding behaviors of the two VASH-SVBP enzyme  
201 complexes and the importance of electrostatic attractive interactions for their microtubule binding.

202

### 203 **Tyrosination has a little effect on the interaction of VASH-SVBP complexes with microtubules.**

204 We then wondered how VASH-SVBP complexes behave on detyrosinated, non-substrate microtubules.  
205 We compared the interaction of both enzyme complexes with microtubules enriched either in  
206 tyrosinated or detyrosinated HeLa tubulin (Tyr-MTs contained 80 % tyrosinated tubulin, 17 %  
207 detyrosinated tubulin, and 3 %  $\Delta 2$ -tubulin (a variant missing the two C-terminal glutamate residues);  
208 deTyr-MTs contained 82 % detyrosinated tubulin, 15 % tyrosinated tubulin, and 3 %  $\Delta 2$ -tubulin; Figure  
209 S1C and Materials and Methods). We tested both active and inactive enzymes to assay the relevance  
210 of detyrosination activity on microtubule binding. To obtain complete traces and determine the  
211 binding characteristics of the two enzymes, a low ionic strength buffer (140 mM) was used for VASH1-  
212 SVBP and a high ionic strength buffer (273 mM) for VASH2-SVBP. Representative kymographs and  
213 binding characteristics are presented in Figure 2E-H and Table 1.

214 Catalytically active and dead versions of each enzyme complex displayed similar short residence times  
215 on deTyr-MTs ( $\tau = 0.5$  s for V1\_FL and  $\tau = 0.6$  s for deadV1\_FL in BRB40 supplemented with 50 mM KCl;  
216  $\tau = 0.6$  s for V2\_FL and  $\tau = 0.7$  s deadV2\_FL in BRB80 supplemented with 100 mM KCl). Both enzyme  
217 versions stayed longer on Tyr-MTs than on deTyr-MTs, and dead enzyme complexes spent slightly  
218 longer times on Tyr-MTs than their active counterparts ( $\tau = 0.8$  s for V1\_FL and  $\tau = 1.2$  s for deadV1\_FL  
219 in BRB40 supplemented with 50 mM KCl;  $\tau = 0.9$  s for V2\_FL and  $\tau = 1.4$  s for deadV2\_FL in BRB80  
220 supplemented with 100 mM KCl). The binding frequency of the catalytically dead VASH1-SVBP mutant



221 was significantly higher than the one of its wild type counterpart on both Tyr-MTs and deTyr-MTs  
222 (Figure 2F). In contrast, the two VASH2-SVBP versions bound Tyr-MTs with similar frequencies (Figure  
223 2H), which were 3 to 4-times lower than the ones of the two VASH1-SVBP versions. Surprisingly, the  
224 binding frequencies of catalytically dead VASH-SVBP mutants were higher on deTyr-MTs than on Tyr-  
225 MTs (Figure 2GH).

226 Thus, our results reveal slightly longer binding periods of both VASH1-SVBP and VASH2-SVBP  
227 complexes on tyrosinated microtubules than on detyrosinated ones (Table 1DE). This was best  
228 observed with the catalytically dead mutants that do not modify microtubules (two-fold longer  
229 binding). With active enzyme complexes, tyrosinated microtubules are progressively detyrosinated  
230 which, during the 30 min time of movie acquisition, could progressively reduce the residence time of  
231 the enzyme complexes (as shown for the highly efficient VASH1-SVBP enzyme complex; Figure S2EF).  
232 In the case of the catalytically dead VASH-SVBP versions, microtubules are not modified over the entire  
233 time of the experiment, allowing a detailed analysis of the interaction between enzymes and  
234 microtubules.

235 In addition, we found that at an appropriate ionic strength the two dead mutants were able to  
236 dissociate from the microtubule lattice, implying that the enzymes' detyrosination activity is not  
237 essential for the release of these enzymes from microtubules. Notably, in such conditions catalytically  
238 active and dead versions of the two enzyme complexes showed diffusion in both directions along  
239 Taxol-stabilized, tyrosinated tubulin-enriched microtubules.

240 Collectively, these results suggest that in vitro, VASH1-SVBP exhibits short and diffusive binding events  
241 on microtubules while VASH2-SVBP displays longer and much more static attachments to them. In  
242 addition, the catalytic activity of the two enzyme complexes does not appear to be essential for their  
243 binding behavior on microtubules.

244

#### 245 **Cryo-EM structure of VASH2-SVBP in complex with a microtubule.**

246 The functional results collected so far suggest that VASH1-SVBP and VASH2-SVBP work very differently  
247 on microtubules. We hypothesized that this could be related to a different binding mode of the two  
248 enzyme complexes with microtubules. To investigate this idea, we analyzed the structure of VASH2-  
249 SVBP in complex with microtubules by cryo-EM. We used the catalytically dead mutant of VASH2-SVBP  
250 and GMPCPP-stabilized HeLa cell microtubules (Figures 3A and S3). Based on a single particle approach  
251 (see Materials and Methods), we found that the majority of microtubules contained 14-  
252 protofilaments. Downstream extraction and single-particle classification of protofilaments revealed  
253 that VASH2-SVBP molecules were present in ~40% of the total binding sites. Subsequent refinement  
254 of the particle subset generated an electron density map of two laterally associated  $\alpha\beta$ -tubulin  
255 heterodimers in complex with VASH2-SVBP at an overall resolution of 3.2 Å (Figure 3B; Figure S3B).



256 In the final map, we could reliably distinguish the  $\alpha$ - and  $\beta$ -tubulin subunits by examining their  
257 corresponding S9-S10 loop densities (Figure S3D), a secondary structure element that differs in length  
258 between both subunits. The resolution of VASH2-SVBP was in the range of 3.3-4.8 Å becoming  
259 progressively higher in regions that are located closer to the microtubule surface (Figure S3C). It was  
260 straightforward to model unambiguously all regular secondary structure elements of all four protein  
261 components,  $\alpha$ -tubulin,  $\beta$ -tubulin, VASH2, and SVBP, into the final electron density map, as well as a  
262 large number of residue side chains and both the tubulin guanosine nucleotides (Figure S3DE). Due to  
263 their intrinsic flexibility, the densities of the  $\alpha$ - and  $\beta$ -tubulin C-terminal tails were defined poorly  
264 beyond the corresponding H12 helices and could thus not be modelled; the same also applied for the  
265 N- and C-termini of VASH2 and N-terminus of SVBP. The cryo-EM structure of the microtubule-bound  
266 VASH2-SVBP is very similar to the one of the free enzyme solved by X-ray crystallography (Wang et al.,  
267 2019) (RMSD over 256 C $\alpha$  atoms of 0.79 Å), suggesting that the core of the enzyme does not undergo  
268 global structural rearrangement upon binding. Notably, the observed protofilament-straddling  
269 interaction between VASH2-SVBP and the microtubule (Figure 3AB) is not feasible for the free  $\alpha\beta$ -  
270 tubulin heterodimer. Therefore, the characteristic binding mode of VASH2-SVBP with its microtubule-  
271 incorporated  $\alpha$ -tubulin substrate underlies the mechanism behind the preferential activity of VASH2-  
272 SVBP for microtubules compared to free tubulin (Kumar and Flavin, 1981). Table 2 provides a summary  
273 of the MolProbity validation statistics for the final atomic model.

274 The model of the microtubule-VASH2-SVBP complex reveals a specific binding of the enzyme complex  
275 on the external surface of the microtubule. The central, positively charged groove of VASH2,  
276 encompassing the catalytic amino acid residue triad Cys158, His193 and Ser210 (Aillaud et al., 2017),  
277 faces towards the microtubule outer surface and is situated directly above the H12 helix of  $\alpha$ -tubulin  
278 from which the flexible C-terminal tail emanates (not visible in the electron density; Figure 3B). Sites  
279 of contacts between VASH2-SVBP and the microtubule outer surface were located primarily on  $\alpha$ -  
280 tubulin suggestive of specific recognition of the target substrate, the C-terminal tyrosine of  $\alpha$ -tubulin.  
281 Conversely, the density corresponding to SVBP was distal from the microtubule-VASH2 binding  
282 interface and did not appear to contribute to the interaction. Interestingly, the VASH2 part of the  
283 enzyme complex binds simultaneously to two  $\alpha$ -tubulin subunits: a  $\alpha$ -tubulin subunit in close proximity  
284 to the VASH2 catalytic site and a  $\alpha$ -tubulin subunit on the adjacent protofilament (henceforth denoted  
285  $\alpha'$ -tubulin; Figure 3B).

286 In support of our previous mutagenesis results (Wang et al., 2019), inspection of the microtubule-  
287 VASH2-SVBP complex structure revealed three primary sites of interaction, denoted site 1, site 2, and  
288 site 3, between the folded region of VASH2-SVBP and the ones of  $\alpha$ - and  $\alpha'$ -tubulin (Figure 3C). At site  
289 1, residues Arg134 and Arg137 of VASH2 form electrostatic interactions with the negatively charged  
290 residues Glu434 and Glu433 of the H12 helix of  $\alpha$ -tubulin, respectively. The S4-S5 loop of VASH2 is

291 implicated in site 2 involving residue His257 and Phe259, which form polar interactions with His393  
292 and Glu386 of  $\alpha$ -tubulin, respectively. Site 3 engages the  $\alpha'$ -tubulin subunit from the adjacent  
293 protofilament where a hydrophobic-aromatic residue interaction between Met292 of VASH2 and  
294 Tyr108 of  $\alpha'$ -tubulin is implicated. In addition, residues Arg288 and Arg291 of VASH2 are likely to form  
295 electrostatic interactions with the negatively charged glutamate residues Glu420 and Glu414 of helix  
296 H12 of the  $\alpha'$ -tubulin subunit, respectively.

297 Taken together, these results show that the structured domain of VASH2-SVBP is capable of binding to  
298 three distinctive sites on the microtubule surface. When bound to the microtubule, VASH2-SVBP  
299 interacts simultaneously with two adjacent protofilaments by binding both the  $\alpha$ -tubulin substrate and  
300 the  $\alpha'$ -tubulin of a neighboring protofilament. This interaction is driven by three binding sites that help  
301 position the positively charged groove of VASH2 in proximity to the C-terminal tail of  $\alpha$ -tubulin. As the  
302 residues directly involved in microtubule-lattice binding are distinct and distal from the catalytic site,  
303 we may consider these as substrate recognition elements that confer specificity to the catalytic activity  
304 of the vasohibin family of tubulin carboxypeptidases.

305

#### 306 **Comparison of the microtubule-binding mode of VASH1-SVBP and VASH2-SVBP.**

307 A cryo-EM structure of microtubule-bound VASH1-SVBP was recently solved based on a truncated,  
308 catalytically inactive version of VASH1 (Cys169 mutated to serine) and recombinant human tubulin (Li  
309 et al., 2020) (PDB ID 6WSL). Superimposition of the microtubule-bound structures of VASH2-SVBP and  
310 VASH1-SVBP revealed minimal structural differences between the two enzyme complexes (RMSD over  
311 244 C $\alpha$  atoms of 1.19 Å). As shown in [Figure 4A](#), comparison of the microtubule-binding modes  
312 revealed that both enzyme complexes contact two adjacent  $\alpha$ -tubulins across neighboring  
313 protofilaments simultaneously and position their catalytic site directly above the H12 helix of one of  
314 the two  $\alpha$ -tubulin subunits. However, they do so at a different relative angle of approximately 24° as  
315 calculated from a plane defined by the C $\alpha$  atoms of the three residues Val81, Glu148, and Glu284 of  
316 VASH2, and Ala92, Glu159, and Glu295 of VASH1.

317 Although the sequence identity between full length VASH1 and VASH2 is high (58%, BLASTp analysis),  
318 the alignment of their sequences reveals non-identical residues at sites 2 and 3 ([Figure S4](#)), which may  
319 explain the observed difference in the overall microtubule-binding mode. Indeed, superimposition of  
320 the microtubule-bound structure of VASH2-SVBP onto that of VASH1-SVBP revealed that in the S4-S5  
321 loop of VASH2, residue Phe259 (Val270 in VASH1) experiences a steric clash with His209 of the H9-S8  
322 loop of  $\alpha$ -tubulin ([Figure 4B](#)). Inspection of the amino acid sequence of the S4-S5 loop of VASH2  
323 revealed the presence of two additional proline residues (Pro253 and Pro261) that are substituted by  
324 a serine and a glutamine, respectively, in VASH1 (Ser264 and Gln272; [Figure 4B](#)). We think that the

325 additional rigidity imposed by these proline residues might force VASH2-SVBP to adapt a tilted  
326 microtubule-binding mode of 24° compared to VASH1-SVBP to accommodate the S4-S5 loop of VASH2.  
327 Binding site 3 displays additional differences between the structures of VASH2-SVBP and VASH1-SVBP,  
328 which may also account for the changes in the microtubule-binding mode of the two enzyme  
329 complexes. The methionine-aromatic interaction of Met292 of VASH2 with Tyr108 of  $\alpha'$ -tubulin is not  
330 possible in VASH1 as the corresponding residue in VASH1 is a leucine (Leu303; [Figure 4C](#)). Furthermore,  
331 VASH2 does not engage the H4 helix of the  $\alpha'$ -tubulin subunit as seen in the VASH1-SVBP structure  
332 ([Figure 4C](#) and (Wang et al., 2019)). Finally, the Arg234 residue in VASH1 is implicated in an electrostatic  
333 attractive interaction with Glu414 of the H12 helix of  $\alpha'$ -tubulin; the corresponding residue in VASH2  
334 (Arg223) is too distal from the  $\alpha'$ -tubulin subunit to establish such an interaction ([Figure 4C](#)). Instead,  
335 Arg291 of VASH2 appears to be in close proximity to Glu414 of  $\alpha'$ -tubulin and likely forms an  
336 electrostatic attractive interaction.

337 To determine what effect the conformational difference in microtubule binding may have on the  
338 enzymatic activity of the two VASH isoforms, we compared the relative position of the VASH1 and  
339 VASH2 catalytic sites ([Figure S5](#)). Using the coordinates of the catalytic triad, we triangulated the  
340 centroid point of the three C $\alpha$  atoms of the corresponding residues as a representative position of the  
341 substrate. Compared to VASH2, the centroid point of VASH1 shifts by 6.3 Å in the direction of the plus-  
342 end and parallel to the protofilament. This places the catalytic cysteine of VASH1 at a distance of 29.7  
343 Å from the Ser439 residue of the H12 helix of  $\alpha$ -tubulin, which is comparable to the distance of 27.3 Å  
344 for VASH2. Residue Ser439 was selected, as it is the closest resolved residue of the  $\alpha$ -tubulin C-  
345 terminus to the processed tyrosine. This analysis suggests that the observed difference in the  
346 microtubule-binding mode between VASH1 and VASH2 core domains has only minimal influence in the  
347 positioning of the catalytic site relative to the H12 helix of  $\alpha$ -tubulin, and that the accessibility of the  
348 substrate C-terminal tail is thus only marginally changed between the two vasohibin isoforms.

349 Taken together, these results show that despite the similarities in the structures of the VASH1-SVBP  
350 and VASH2-SVBP core domains, a clear difference in their microtubule-binding pose is observed. These  
351 alternate poses are likely driven by the changes in the amino acid sequence of the S4-S5 loop between  
352 both enzymes, which forms interactions with site 2 of  $\alpha$ -tubulin. Additional contribution may arise  
353 from the differences observed in the microtubule-binding residues at site 3 of  $\alpha'$ -tubulin. However,  
354 this divergence could have only limited effect on the enzyme's activity since the accessibility of the  $\alpha$ -  
355 tubulin C-terminal tyrosine is quite similar.

356

### 357 **The core domains of VASH1 and VASH2 in complex with SVBP behave similarly.**

358 As the cryo-EM structures of microtubules in complex with VASH1-SVBP and VASH2-SVBP revealed  
359 specific interactions of the enzymatic core domains of VASHs with microtubules, we wonder how

360 truncated versions of the enzymes containing only these central regions behave on microtubules in  
361 vitro. We thus examined the detyrosinating activity of VASH1 and VASH2 core domains in complex  
362 with SVBP (V1\_CD and V2\_CD, [Figures 5AB and S1A](#)), and used their catalytically dead versions  
363 (deadV1\_CD and deadV2\_CD) in order to avoid evolution of substrate over time to study their  
364 interaction with microtubules in single molecule TIRF experiments ([Figure 5DE](#)). A schematic  
365 representation of the two VASH proteins with their different domains is presented in [Figure 5C](#).

366 The two VASH core domains were active and, interestingly, they both led to global detyrosination of  
367 microtubules ([Figure 5AB](#)), as did full-length VASH1-SVBP but not VASH2-SVBP ([Figure 1A-C](#)). Analysis  
368 of the overall decrease in tyrosinated tubulin signal showed that the VASH2 core domain was  
369 significantly less active than the VASH1 core domain under the buffer conditions used. The latter result  
370 could be related to the different binding modes of the two complexes with microtubules as observed  
371 by cryo-EM: interactions with  $\alpha$ - and  $\alpha'$ -tubulin at sites 2 and 3, respectively, could be less favorable  
372 for the VASH2 activity than for the VASH1 activity ([Figures 3 and 4](#)). As with activity, the complexes  
373 containing core domains of VASHs exhibited binding characteristics on microtubules similar to those  
374 of the complex with full-length VASH1 ([Figure 5DE and Table 3](#)). They displayed residence times of 1.2-  
375 1.4 s, thus close to that of full length VASH1-SVBP and at least 10-times shorter than residence time of  
376 full length VASH2-SVBP ([Table 3](#)). They showed binding frequency close to that of full length VASH1-  
377 SVBP and approximately 5-times higher than that of full length VASH2-SVBP ([Table 3](#)).

378 Thus, the catalytic core domains of both VASHs behave quite similarly, which is in contrast to their full-  
379 length counterparts. Since the strong divergence between the functioning of the two VASH-SVBP  
380 enzymatic complexes did not arise from the microtubule-binding mode of these central regions, we  
381 hypothesized that their disordered N- and C-terminal flanking regions could explain the observed  
382 differences.

383

### 384 **The N- and C-terminal domains of VASHs strongly contribute to the interaction of VASH-SVBP** 385 **enzyme complexes with microtubules.**

386 To understand better the differences in behavior between VASH1-SVBP and VASH2-SVBP, we analyzed  
387 the role of their N- and C-terminal disordered regions for interaction of the enzymes with  
388 microtubules. To this end, we compared the interaction of dead enzymes containing full-length  
389 VASH1/2 (deadV1/2\_FL) or their truncated versions lacking either the C- (deadV1/2\_Nt+CD) or N-  
390 terminal domains (deadV1/2\_CD+Ct) with tyrosinated tubulin-enriched microtubules (Tyr-MTs)  
391 ([Figure 5DE and S1A](#)).

392 The two mutated enzyme complexes containing the C-terminal region and the catalytic core domain  
393 of VASH (CD+Ct proteins) associated strongly to Tyr-MTs, resembling the binding behavior of full-  
394 length VASH2-SVBP ([Figure 5D](#)). Their mean residence times on microtubules were  $>7$  s ([Table 3](#)). In

395 contrast, the two mutant enzymes containing the N-terminal region and the core domain (Nt+CD  
396 proteins) behaved very differently: while the VASH1 mutant did not bind to microtubules, the VASH2  
397 mutant showed a long residence-time (Figure 5D and Table 3). Its residence time was even longer than  
398 the complex with only the catalytic core domain of VASH2 ( $\tau = 1.2$  s for deadV2\_CD and  $\tau > 4.0$  s for  
399 deadV2\_Nt+CD). Intriguingly, high residence times were usually associated with low binding  
400 frequencies, as if long binding events ruled out new ones. This was similarly observed with full-length  
401 VASH2-SVBP (Figure 1DF and Table 1A) and could be due to the presence of fluorescence-quenched  
402 molecules that were still attached to the microtubule lattice.

403 Since ionic strength strongly affected both the binding of enzymes to microtubules as well as their  
404 detyrosination activity (Figures 2A-D and Table 1), we calculated the isoelectric points of the different  
405 regions of VASH1 and VASH2. Interestingly, the C-terminal parts of the VASHs are both very basic, while  
406 their N-terminal regions exhibit extremely different isoelectric points. The N-terminal region of VASH1  
407 is acidic as opposed to that of VASH2, which is very basic (Figure 5C). The basic character of the C-  
408 terminal parts of VASHs most probably favors binding of the enzyme complexes to the acidic surface  
409 of microtubules composed of stretches of acidic glutamates and aspartates from the  $\alpha$ - and  $\beta$ -tubulin  
410 subunits (Redeker, 2010) (deadV1\_CD+Ct, deadV2\_CD+Ct, Figure 5D and Table 3A). The strong acidic  
411 nature of the N-terminal part of VASH1 could explain the lack of binding of the mutant enzyme lacking  
412 the basic C-terminal region (deadV1\_Nt+CD, Figure 5D and Table 3A). In the case of VASH1-SVBP, its  
413 acidic N-terminal part could oppose the interaction of the rest of the protein (core domain and C-  
414 terminal region) with microtubules, and thus assist in the release of the enzyme complex from the  
415 microtubule. The role of the basic N-terminal part of VASH2 is less clear, but this region might also help  
416 the dissociation of the enzyme complex from the microtubule lattice. Indeed, the residence-time of  
417 full-length VASH2 is significantly longer than that containing the truncated mutant missing the N-  
418 terminal region ( $\tau > 17.1$  s for deadV2\_FL and  $\tau > 10.4$  for deadV2\_CD+Ct, Table 3A).

419 Overall, these results reveal the important contribution of the N- and C-terminal regions of VASH for  
420 the interaction of the two enzyme complexes with microtubules. They further suggest an essential role  
421 of the VASHs' N-terminal regions for their divergent activities in vitro, global versus local  
422 detyrosination.

423

#### 424 **The N-terminal domains of VASHs mediate the divergent microtubule-binding and detyrosination** 425 **activities.**

426 To test the hypothesis that the N-terminal regions of VASHs are critical for the distinct behavior of  
427 these enzymes, we constructed chimeras by inverting the N-terminal region of one VASH with the one  
428 of the other (Figure S1A). We tested catalytically active and inactive versions of these chimeras for  
429 their interaction with microtubules (V1\_FL(NtV2), V2\_FL(NtV1), deadV1\_FL(NtV2), deadV2\_FL(NtV1))

430 and compared their behavior to the ones of the wild type enzymes. Representative kymographs and  
431 binding characteristics are presented in [Figure 6A-F](#) and [Table 3BC](#). As expected, the presence of the  
432 basic N-terminal region of VASH2-SVBP significantly changed the binding behavior of VASH1-SVBP  
433 ([Videos S1 and S3](#)). The residence-times of the chimeras were more than 8-times higher than those of  
434 the native VASH1-SVBP ( $\tau = 1.2$  s for V1\_FL;  $\tau = 1.2$  s for deadV1\_FL;  $\tau > 10.7$  s for V1\_FL(NtV2);  $\tau > 9.9$   
435 s for deadV1\_FL(NtV2)). Their residence times were therefore more similar to the residence time of  
436 full-length VASH2-SVBP ( $\tau > 13.4$  s for deadV2\_FL;  $\tau > 12.9$  for V2\_FL). The presence of the acidic N-  
437 terminal region of VASH1 also significantly changed the binding behavior of VASH2-SVBP ([Videos S2](#)  
438 [and S4](#)). The residence time of the chimera on microtubules was more than 4-times shorter than the  
439 one of the active wild type enzyme ( $\tau > 12.9$  for V2\_FL;  $\tau > 3.9$  for V2\_FL(NtV1)), and 2-times shorter  
440 for the dead version ( $\tau > 13.4$  for deadV2\_FL;  $\tau > 6.5$  for deadV2\_FL(NtV1)).

441 The exchange of the N-terminal regions also strongly altered the diffusion of the enzyme complexes  
442 on microtubules and their covering of the microtubule lattices ([Figure 6C-F](#)). The chimeric complex  
443 with the N-terminal region of VASH2 and the remainder of VASH1 diffused poorly compared to VASH1-  
444 SVBP, and its covering of microtubules was significantly reduced. This was true for both the dead and  
445 catalytically active versions of VASH1-SVBP. In contrast, replacement of the N-terminal region of  
446 VASH2 with that of VASH1 significantly increased the diffusion and enhanced microtubule covering by  
447 VASH2-SVBP. This was particularly evident for the active chimera, which in the presence of the N-  
448 terminal region of VASH1 revealed a diffusion capacity equal to that of VASH1-SVBP ([Figure 6D](#)). The  
449 catalytically dead VASH2 chimera, however, retained a significantly lower diffusion capacity than  
450 VASH1-SVBP (and of its active counterpart, [Figure 6CD](#)). This difference could be due to the absence  
451 of a possible structural change occurring during tyrosine cleavage, which could favor VASH2 release  
452 from microtubules. This would be consistent with the significantly lower diffusion capacity of the dead  
453 VASH2 version compared to its active counterpart (1.4  $\mu\text{m/s}$  for V2\_FL and 1.0 for deadV2\_FL in BRB40  
454 supplemented with 50 mM KCl ([Figure 1H](#)); 1.6  $\mu\text{m/s}$  for V2\_FL and 1.3 for deadV2\_FL in BRB80  
455 supplemented with 100 mM KCl, not shown). The binding frequencies of VASH1 chimeras were  
456 strongly reduced compared with those of VASH1 (with a 4.7-fold decrease for active versions and a  
457 1.7-fold decrease for dead versions, [Table 3BC](#)). The binding frequency was almost unchanged for the  
458 dead VASH2 chimera compared to that of the dead VASH2, which was not the case for the active  
459 versions, with the VASH2 chimera having a clearly higher binding frequency than VASH2 (1.9-fold  
460 increase, [Table 3BC](#)).

461 We then examined the microtubule detyrosination activity of the chimeras (V1\_FL(NtV2) and  
462 V2\_FL(NtV1)) ([Figure 6FG](#)) using immunofluorescence. Both chimeras induced global detyrosination,  
463 resembling the way VASH1-SVBP acts on microtubules. Thus, the presence of the N-terminal region of  
464 VASH1 changed the detyrosinating behavior of VASH2-SVBP from local to global, correlating with the



465 TIRF experiment showing that the chimera is much more diffusive and has a higher binding frequency  
466 (Figure 6D, Table 3C). On the other hand, despite inducing an important loss of diffusion capacity  
467 (Figure 6D), the N-terminal region of VASH2 did not appreciably switch the behavior of VASH1-SVBP  
468 (Figure 6G). The VASH1 chimera still induced global microtubule modifications. This result could be  
469 due to the core domain of VASH1 being significantly more active than the one of VASH2 (Figure 5B).  
470 Notably, quantification of tyrosinated tubulin levels showed that changes were significantly larger for  
471 the VASH1 chimera than for the VASH2 chimera, like for their wild type counterparts.  
472 Together, our data reveal the importance of the N-terminal regions of the VASHs in the divergent  
473 binding of VASH-SVBP complexes to the microtubule lattice as well as their detyrosination activity.  
474 Indeed, by exchanging these regions, we were able to switch the microtubule-binding behavior and  
475 activity of one enzyme to that of the other one.

476

#### 477 **VASH1 and VASH2 give rise to distinct detyrosination patterns in cells.**

478 To test whether our in vitro results are relevant in cells, we assayed recombinant VASH-SVBP activities  
479 on exposed microtubules of murine embryonic fibroblasts (MEFs). Cultured MEFs were incubated in a  
480 buffer containing Triton-X100 for lysis and glycerol to stabilize microtubules (see [Material and](#)  
481 [Methods](#)). Figure 7 show that native MEFs mainly contain tyrosinated microtubules and that addition  
482 of active VASH-SVBP complexes (V1\_FL and V2\_FL) at 50 or 200 pM led to a marked increase of  
483 detyrosination of cellular microtubules. Most likely due to concentration of microtubules, the  
484 observed increase was greater around nuclei. Interestingly and similar to what was observed in vitro,  
485 while the VASH1-SVBP complex induced a diffuse and spread microtubule detyrosination, VASH2-SVBP  
486 led to the formation of local areas of lattice modifications. Thus, our data show that the two VASH-  
487 SVBP enzymes generate different patterns of microtubule detyrosination both in a reconstituted  
488 system and in cells.

489

## 490 **DISCUSSION**

491 Our in vitro and in cellulo findings reveal divergent activities of the two VASH-SVBP enzymes, with  
492 VASH1-SVBP leading to global microtubule detyrosination and VASH2-SVBP generating local areas of  
493 microtubule lattice modifications. These different activities are driven by the different microtubule  
494 binding behaviors of the two VASH-SVBP enzymes (see [graphical abstract](#)).

495 We found a moderately stable interaction of the two VASH core domains with the microtubule lattice,  
496 which includes the specific recognition of two  $\alpha$ -tubulin subunits from adjacent protofilaments of the  
497 substrate. While the involved interaction sites confer specificity to this family of tubulin



498 carboxypeptidases, the disordered N- and C-terminal regions of VASHs contribute to their microtubule-  
499 binding strength and therefore to their mode of action.

500 The common C-terminal, strongly positively charged region of the two VASHs considerably lengthen  
501 the interaction time of both enzyme complexes with microtubules. A reasonable model explaining this  
502 observation is that this basic region interacts through electrostatic attractive interactions with the  
503 negatively charged outer surface of microtubules (mostly composed of acidic residues stemming from  
504 the C-termini of both  $\alpha$ - and  $\beta$ -tubulin (Redeker, 2010)), allowing to hold an enzyme complex close to  
505 the microtubule surface as it moves from one tubulin dimer to another. The C-terminal VASH region  
506 could thus maintain an enzyme complex bound to the lattice when its catalytic central domain  
507 transiently detaches from it upon cleavage of the C-terminal  $\alpha$ -tubulin tyrosine to reach the next  
508 substrate. Such a mechanism would increase both the residence time of a VASH-SVBP complex with  
509 microtubule lattices as well as its activity.

510 In contrast, the N-terminal domain of the two VASHs could be involved in the release mechanism of  
511 the enzyme complex from microtubules, and consequently contribute to its diffusion on the lattice.  
512 This is particularly clear for VASH1-SVBP: the VASH1 mutant lacking the N-terminal region shows a  
513 significantly increased residence time. Moreover, VASH1-SVBP switches from a diffusive to a static  
514 binding behavior on microtubules when the N-terminal region is removed. Due to its many negative  
515 charges, this domain probably behaves as an electrostatic “repellent”, promoting detachment of the  
516 enzyme from the surface of microtubules. This is not the case for the N-terminal region of VASH2,  
517 which in contrast to the one of VASH1 is strongly positively charged; it might thus contribute together  
518 with its positively charged C-terminal region to the very long residence time of VASH2-SVBP on  
519 microtubules.

520 Our data suggest that the diffusive capacity of VASH1-SVBP, sustained by its N-terminal domain,  
521 promotes the global detyrosination of microtubules by this enzyme in vitro. The local detyrosination  
522 observed for VASH2-SVBP likely relies on its weak diffusion capacity along microtubules. The two  
523 enzymes can nevertheless be considered as processive, i.e., they are capable to catalyze several  
524 consecutive reactions without fully detaching from a microtubule. VASH1-SVBP shows higher  
525 detyrosination activity than VASH2-SVBP most probably because it has a higher diffusive capability. In  
526 addition, VASH1 might have a higher cleavage efficiency than VASH2, as suggested by the increased  
527 detyrosination activity of the central domain of VASH1 compared to the one of VASH2 (Figure 5B).

528 Notably, our work reveals that as for molecular motors (Zhernov et al., 2020) electrostatic interactions  
529 are key factors in the association between VASH-SVBP complexes and microtubules, making their  
530 processive enzymatic functioning possible. Indeed, the disordered flanking regions of the highly  
531 structured VASH core domains fine-tune the association via such electrostatic interactions.  
532 Interestingly, the N-terminal regions of the VASHs bearing opposite charges give rise to both a

533 divergent microtubule-binding behavior as well as a different activity of the two enzyme complexes in  
534 a reconstituted system. Other mechanisms, such as specific post-translational modifications (like, e.g.,  
535 phosphorylation or polyglutamylation) or association of protein partners (such as MAP4 in  
536 cardiomyocytes (Yu et al., 2021)) could also positively or negatively modulate these electrostatic  
537 interactions in cells, and therefore influence the association between VASH-SVBP and microtubules as  
538 well as the enzymes' detyrosination activity.

539 In conclusion, our results reveal a novel pathway by which microtubules can be modified differently  
540 depending on the detyrosinating enzyme at work. This mechanism could have implications in the  
541 diversity of microtubules reported in cells (for a review see (Roll-Mecak, 2019; Roll-Mecak, 2020)),  
542 which likely contain different compositions of detyrosinating enzymes. With the very recent discovery  
543 of the third detyrosinating enzyme MATCAP (Landskron et al., 2022), which uses a fundamentally  
544 different catalytic mechanism (being a metalloprotease instead of a cysteine protease) and adopts an  
545 alternative microtubule-binding mode and a different way of detyrosinating microtubules, the  
546 complexity of microtubule detyrosination in cells may even be more complex. These different  
547 microtubule detyrosinating enzymes likely encode numerous subpopulations of microtubules bearing  
548 different tyrosination signal patterns that, when read by effectors, could fine-tune physiological  
549 processes in specific regions of the cell. Of particular interest is that the VASH2-SVBP complex, which  
550 is expressed weakly in most cells, can generate highly localized spots of detyrosinated tubulin on  
551 microtubule. We speculate that these spots, by generating areas on microtubules unable to bind  
552 protein partners such as, for example, CAP-Gly proteins or tyrosine-sensitive molecular motors (Chen  
553 et al., 2021; Peris et al., 2006; Peris et al., 2009), may have a role in cytoskeletal organization and/or  
554 intracellular trafficking in confined regions of cells. Several physiological processes, including cell  
555 division, organization, or migration could require such local signals for proper functioning. In this  
556 context, a better understanding of the regulation of tubulin-detyrosinating enzymes as well as their  
557 spatial and temporal expression patterns in cells becomes essential.

558

## 559 **MATERIAL AND METHODS.**

560

### 561 **Constructs and enzymes purification for TIRF and immunofluorescence studies.**

562 The cDNA encoding human full-length SVBP (NP\_955374, residues 1-66) was cloned into the first  
563 multiple cloning site of a modified pETDuET-1 vector, to generate a fusion protein with C-terminal myc  
564 and FLAG tags. The cDNAs encoding the human VASH1 (NP\_055724) and VASH2 (NP\_001287985) were  
565 cloned into the second multiple cloning site of the modified vector, to generate fusion proteins with  
566 an N-terminal superfolder GFP (sfGFP) followed by a PreScission cleavage site, plus C-terminal myc and

567 His tags. The VASH1 and VASH2 constructs used in this study (Figure S1A) were : VASH1 full-length  
568 (V1\_FL, residues 1-365), dead VASH1 full-length, (deadV1\_FL, residues 1-365, C169A), VASH1 core  
569 domain (V1\_CD, residues 57-307), dead VASH1 core domain (deadV1\_CD, residues 57-307, C169A),  
570 dead VASH1 core domain + N-ter (deadV1\_CD+Nt, residues 1-307, C169A), dead VASH1 core domain  
571 + C-ter (deadV1\_CD+Ct, residues 57-365, C169A), VASH2 full length (V2\_FL, residues 1-355), dead  
572 VASH2 full length (deadV2\_FL, residues 1-355, C158A), VASH2 core domain (V2\_CD, residues 40-296),  
573 dead VASH2 core domain (deadV2\_CD, residues 40-296, C158A), dead VASH2 core domain + N-ter  
574 (deadV2\_CD+Nt, residues 1-296, C158A), dead VASH2 core domain + C-ter (deadV2\_CD+Ct, residues  
575 40-355, C158A), dead VASH2 with VASH1 N-ter (deadV2\_NtV1, VASH1 residues 1-49 and VASH2  
576 residues 40-355, C158A), dead VASH1 with VASH2 N-ter (deadV1\_NtV2, VASH2 residues 1-39 and  
577 VASH1 residues 51-365, C169A). For the above dead versions, mutations were introduced using a  
578 standard PCR procedure. All constructs were verified by DNA sequencing (GENEWIZ). The cloning for  
579 non-sfGFP tagged proteins expression were described in (Wang et al., 2019).

580 Protein expression and purification of the various His-tagged VASH1/2-SVBP complexes were  
581 performed as previously described (Wang et al., 2019) with slight modifications. Briefly, BL21(DE3) *E.*  
582 *coli* cells were transformed with the corresponding construction and then cultured in Luria-Bertani (LB)  
583 medium at 37 °C. Protein expression was induced by addition of 0.5 mM IPTG and overnight incubation  
584 at 18 °C. Cells were collected and resuspended in lysis buffer (50 mM HEPES pH 8.0, 500 mM NaCl, 10%  
585 glycerol, 20 mM imidazole, 2 mM DTT and cOplete EDTA-free protease inhibitor cocktail tablets (GE,  
586 Healthcare)). Following cell lysis by sonication, the extract was clarified by centrifugation at 100,000 *g*  
587 for 30 min at 4 °C. Total lysate was loaded in a HisTrap HP Ni<sup>2+</sup> Sepharose column (GE Healthcare).  
588 Column was then extensively washed using lysis buffer, and enriched VASH1/2 -SVBP complexes were  
589 eluted from the HisTrap HP Ni<sup>2+</sup> Sepharose column using elution buffer (lysis buffer with imidazole  
590 concentration raised to 400 mM). Protein fractions were further collected and concentrated, and  
591 finally purified with a Superdex 200 10/300GL (GE Healthcare) size exclusion column. The  
592 concentration of soluble proteins was measured using Bradford assay with bovine serum albumin  
593 (BSA) as the standard. All proteins were kept in storage buffer (20 mM Tris-HCl at pH 7.4, 150 mM  
594 NaCl, 2 mM DTT) and stored in liquid nitrogen until further use.

595

#### 596 **Preparation of tubulin and Taxol-stabilized microtubules**

597 Preparation of brain tubulin and its labelling with either biotin or ATTO-565 fluorophore (ATTO-TEC  
598 GmbH) were performed according to (Ramirez-Rios et al., 2017). HeLa tubulin proteins used in this  
599 study were purified as previously described (Souphron et al., 2019). All tubulin proteins were stored in  
600 liquid nitrogen.

601 Taxol-stabilised microtubules were prepared by polymerising 45  $\mu$ M tubulin (composed of 65% of HeLa  
602 tyrosinated or detyrosinated tubulin, 30% biotinylated brain tubulin and 5% ATTO-565-labelled brain  
603 tubulin, named Tyr-MT or deTyr-MT, respectively) in BRB80 (80 mM PIPES(piperazine-N,N'-bis(2-  
604 ethanesulfonic acid)-KOH at pH 6.8, 1 mM  $MgCl_2$ , 1 mM EGTA) supplemented with 1 mM GTP. Taxol  
605 (100  $\mu$ M) was then added, and microtubules were further incubated for 30 min. Microtubules were then  
606 centrifuged for 5 min at 200,000x *g* and resuspended in BRB80/10  $\mu$ M Taxol buffer. All incubations and  
607 centrifugations were carried out at 35°C. Using a method described in (Aillaud et al., 2016), we  
608 estimated that Tyr-MTs contained 80 % tyrosinated, 17 % detyrosinated and 3 %  $\Delta 2$ -tubulin, while  
609 deTyr-MT contained 82 % detyrosinated, 15 % tyrosinated and 3 %  $\Delta 2$ -tubulin (see Figure S1C).

610

### 611 **In vitro binding assays**

612 Experiments were conducted in the media indicated on Figures: BRB40 or BRB80 (40 or 80 mM PIPES-  
613 KOH at pH 6.8, 1 mM  $MgCl_2$ , 1 mM EGTA) buffers supplemented or not with the indicated concentrations  
614 of KCl. Ionic force of media was calculated as in (Thiede et al., 2013) (see Table 1). Flow chambers for  
615 TIRF imaging assays were prepared as previously described (Stoppin-Mellet et al., 2020). Perfusion  
616 chambers were treated with 30  $\mu$ l neutravidin (ThermoFisher, 31000, 25  $\mu$ g/ml) incubated for 3 min  
617 followed by 50  $\mu$ l PLL20K-G35-PEG2K (0.1 mg/ml, Jenkem) for 30-45 sec. Chambers were then washed  
618 3 times with 100  $\mu$ l 1% BSA in indicated medium. Subsequently, microtubules enriched in HeLa  
619 tyrosinated or detyrosinated tubulin (Tyr- or deTyr-MTs) prepared as above were diluted to 40  $\mu$ M and  
620 perfused into the chamber. Then, the flow chamber was flushed 3 times by 100  $\mu$ L of 1% BSA/10  $\mu$ M  
621 Taxol in medium to remove unbound microtubules. Finally, sfGFP-VASH1/2-SVBP complexes were  
622 perfused in an assay-mix solution (medium supplemented with 82  $\mu$ g/ml catalase, 580  $\mu$ g/ml glucose  
623 oxidase, 1 mg/ml glucose, 4 mM DTT, 0.5 mM Taxol, 0.017% methylcellulose 1500 cp). All incubations  
624 were made at room temperature. The chamber was sealed and then imaged using TIRF microscope.

625

### 626 **TIRF in vitro assay**

627 Images were recorded within the first 30 min following addition of the assay-mix solution (see above)  
628 on an inverted microscope (Eclipse Ti, Nikon) equipped with a Perfect Focused System, a CFI  
629 Apochromat TIRF 100X/1.49 N.A oil immersion objective (Nikon), a warm stage controller (Linkam  
630 Scientific) and a Techniplast chamber to maintain the temperature, an objective heater (OkoLab),  
631 an iLas2 TIRF system (Roper Scientific) and a sCMOS camera (Prime95B, Photometrics) controlled by  
632 MetaMorph software (version 7.10.3, Molecular Devices). For dual view imaging, an OptoSplit II bypass  
633 system (Cairn Research) was used as image splitter and illumination was provided by 488- and 561-nm  
634 lasers (150 mW and 50 mW respectively). Temperature was maintained at 35 °C for all imaging  
635 purposes. Acquisition rate was one frame each 50 ms exposure (in streaming acquisition) during 45 s.

636 For each condition at least two slides from two independent experiments using different protein  
637 preparations were done.

638

### 639 **In vitro assay of detyrosination activity using immunofluorescence**

640 Immunofluorescence in vitro assays were made using exactly the same perfusion chambers and TIRF  
641 experiments conditions as above. After addition of the assay-mix solution, incubation was done at 37  
642 °C for 30 min followed by 3 washes with 10 µM Taxol and 1% BSA in indicated medium (wash buffer).  
643 Then, incubation with primary antibodies was done for 15 min, followed by 3 washes with 100 µL of  
644 wash buffer, incubation with secondary antibodies for 15 min and finally 3 washes with 100 µL of wash  
645 buffer. Primary antibodies were rat anti-tyrosinated tubulin (YL1/2 = anti-Tyr, 1:6000) and rabbit anti-  
646 detyrosinated tubulin (anti-deTyr, 1:1000) (see (Aillaud et al., 2016)) and secondary antibodies were  
647 anti-rat coupled to Alexa Fluor 488 and anti-rabbit coupled to Cyanine 3 (Jackson ImmunoResearch)  
648 both diluted to 1:500. Images were obtained using a LEICA DMI600/ROPER microscope controlled by  
649 Metamorph Video software using the same illumination conditions. For each condition at least three  
650 independent experiments with different protein preparations were done.

651

### 652 **Assays of detyrosination in cells**

653 Murine embryonic fibroblasts (MEFs) were prepared as previously described (Erck *et al.*, 2005). Cells  
654 were treated with BRB80 supplemented with 1 % Triton X-100 and 10% glycerol at 35°C for 15 s.  
655 Permeabilized cells were washed twice with BRB80 supplemented with 10 % glycerol, incubated with  
656 50 or 200 pM of recombinant sfGFP-VASH-SVBP complexes during 30 min at 37°C, and rinsed twice  
657 with BRB80 supplemented with 10 % glycerol.

658 For immunofluorescence, cells were washed in warm phosphate buffered saline (PBS) supplemented  
659 with 0.1 % Tween and fixed in freshly prepared -20°C methanol. They were then incubated with  
660 primary antibodies (anti-Tyr and anti-deTyr; 1:500), followed by incubation with secondary antibodies  
661 (anti-rat conjugated with Alexa Fluor 488 ; anti-rabbit conjugated with Cyanine 3 ; 1:500). Samples  
662 were mounted using DAKO medium supplemented with Hoescht 33258 (1 µg/ml). Images were  
663 captured with a Zeiss Axiovert 200M microscope equipped with the acquisition software MetaMorph  
664 using the same illumination conditions.

665

### 666 **SDS-PAGE, immunoblotting and antibodies**

667 Equal amounts of purified proteins (1.5 µg) were loaded onto 4-20% gradient polyacrylamide gels  
668 (Biorad) and separated by electrophoresis. Proteins were transferred to nitrocellulose membranes and  
669 probed as follow: rabbit anti-GFP from Life Technologies (1:10,000), mouse anti-His from Qiagen  
670 (1:10,000), home-made rabbit anti-VASH1, anti-VASH2 and anti-SVBP (all used at 1:10,000), and mouse

671 anti- $\alpha$  tubulin ( $\alpha$ tot, 1:5,000), rat anti-Tyr (YL<sub>1/2</sub>, 1:5,000), rabbit anti-deTyr (1:20,000), rabbit anti- $\Delta$ 2  
672 tubulin (1:20,000). All anti-tubulin antibodies were described in (Aillaud et al., 2016). Anti-VASH1 Gre  
673 was described in (Chen et al., 2020). Anti-VASH2 Gre and anti-SVBP Gre were produced in a similar  
674 manner against peptides AIRNAAFLAKPSIPQVPNYRLSMTI of VASH2 and  
675 DPPARKEKSKVKEPAFRVEKAKQKS of SVBP, respectively. Incubation with primary antibodies were  
676 followed by incubation with secondary antibodies conjugated with horseradish peroxidase (Jackson  
677 ImmunoResearch). Blots were finally revealed using Pierce™ ECL Western Blotting Substrate  
678 (ThermoFisher Scientific) and a ChemiDoc MP Imaging System (BioRad) according to the  
679 manufacturer's protocol.

680

### 681 **Cloning and protein purification of VASH2-SVBP sample for cryo-EM studies**

682 The human cDNAs of full length VASH2 (UniProtKB ID Q86V25) and full length SVBP (Q8N300) were  
683 codon optimized for *E. coli* expression and synthesized (GENEWIZ). The sequence of VASH2 was modified  
684 by mutating Cys158 to alanine resulting in a catalytically inactive protein (Wang et al., 2019). The  
685 synthetic cDNAs were then cloned into two different plasmids, VASH2 into pET3d (Novagen) and SVBP  
686 into pET28 (EMD Biosciences). When inserted into the pET28 vector, the SVBP sequence was fused to a  
687 His<sub>6</sub> tag at its C-terminus for purification purposes. Protein expression and purification of the His-tagged  
688 VASH2-SVBP complex was performed as previously described (Wang et al., 2019). Final protein samples  
689 were snap frozen in liquid nitrogen at 2 mg/ml concentration and stored at -80°C.

690 GMPCPP-stabilized microtubules were prepared using HeLa cell tubulin prepared as in (Souphron et al.,  
691 2019). Purified tubulin was resuspended at 4 mg/ml on ice using BRB80 buffer and GMPCPP was added  
692 to 0.5 mM final concentration. The tubulin solution was incubated on ice for 5 min then centrifuged for  
693 10 min at 16,000x g at 4°C. The supernatant was transferred to a fresh tube and placed on a 37°C heat  
694 block for 40 min. Subsequently, the microtubule solution was kept at 20°C before use.

695

### 696 **Cryo-EM grid preparation**

697 Glow discharged Quantifoil Cu300 R2/1 holey carbon EM grids (Electron Microscopy Sciences) were used  
698 for specimen preparation. Microtubules were centrifuged for 10 min at 16,000x g and thoroughly  
699 resuspended in BRB80 buffer to 2 mg/ml. 3.5  $\mu$ l of the microtubule solution was applied to the EM grid  
700 and incubated for 1 min at room temperature. The grid was blotted manually and 3.5  $\mu$ l of a 2 mg/ml  
701 V2-SVBP solution was applied to the grid that was then transferred immediately to the chamber of the  
702 Vitrobot (ThermoFisher) pre-equilibrated at 25°C and 100% relative humidity. After 1 min of incubation,  
703 the grid was blotted for 1 s at blot force of 0 and plunge frozen into liquid ethane. Grids prepared this  
704 way were stored in liquid nitrogen prior to imaging.

705



## 706 **Cryo-EM data collection and image processing**

707 Movies were recorded on a Titan Krios at 300 keV (Thermo Fisher), with a GIF Quantum LS Imaging filter  
708 (20 eV slit width) and a K2 Summit electron counting direct detection camera (Gatan) at a magnification  
709 of 47,260 x, resulting in a pixel size of 1.058 Å, using SerialEM (Mastronarde, 2005). The defocus varied  
710 between -0.6 and -2.2 µm. For the HeLa sample, 3,345 movies were recorded with a total dose of 65 e-  
711 /Å<sup>2</sup> per movie (9 sec exposure in total, 0.2 sec per frame, 45 frames in total). The dose rate was ~7.2 e-  
712 /Å<sup>2</sup> per second (~1.4 e-/Å<sup>2</sup> per frame). For image processing, the software Relion 3.0.8 (Scheres, 2012)  
713 was used. The protocols described in (Cook et al., 2020) and (Debs et al., 2020) were followed with some  
714 adaptations. In brief, the movies were drift-corrected and dose-weighted using MotionCor2 (Zheng et  
715 al., 2017) and the contrast transfer function parameters were estimated from the motion-corrected  
716 electron micrographs using Gctf (Zhang, 2016). Afterwards, microtubule sections were manually picked  
717 from the HeLa tubulin data set. Boxes with a size of 600 pixels, re-scaled to 150 pixels with inter-box  
718 distance of 82 Å, were extracted. Superparticles were created and processed as previously described  
719 (Cook et al., 2020). To compensate for the incomplete decoration of VASH2-SVBP to the microtubule in  
720 our cryo-EM sample and improve the signal-to-noise of the VASH2-SVBP density, we selected and  
721 subtracted regions of the protofilament where VASH2-SVBP had bound to generate the final map. After  
722 subtraction of all possible VASH2-SVBP binding sites at α-tubulin, 3D classification of the particles was  
723 performed to identify sites where VASH2-SVBP had bound to the microtubule in a manner similar to  
724 described previously (Debs et al., 2020). Single-particle refinement of the particles containing VASH2-  
725 SVBP decorated tubulin was performed to generate the final structure.

726

## 727 **Model building and refinement**

728 An initial structural model of the microtubule bound VASH2-SVBP complex was generated in Chimera  
729 by combining the GMPCPP-stabilized microtubule (Zhang, 2016) (PDB ID 3JAL) with the crystal structure  
730 of the human VASH2-SVBP complex (PDB ID 6QBY). The models were imported into Chimera (Pettersen  
731 et al., 2004), and the Fit-in-Map function was used to perform a rigid-body fit of one VASH2-SVBP  
732 complex structure and two laterally aligned αβ-tubulin heterodimers into the final cryo-EM map. The  
733 models were then combined and refined in Coot (Emsley and Cowtan, 2004) using 'Set Geman-McClure  
734 alpha 0.01' while all molecule self-restraints were set to 5.0 in the ProSMART module (Nicholls et al.,  
735 2014). The model was then further refined in Coot using the 'Chain Refine' command. Finally, the model  
736 and map were exported to Phenix (Liebschner et al., 2019) and the 'Real-space Refinement' tool was  
737 used to complete the refinement. MolProbity (Chen et al., 2010) was used to assess the model quality  
738 and generate the values reported in [Table 2](#). Chimera and PyMOL (Schrodinger, 2020) were used for the  
739 generation of figures.

740



741 **Statistical analysis**

742 **Data analysis of TIRF.** Binding/tracking of single VASH1/2-SVBP molecules for estimation of binding  
743 parameters and diffusion were measured on kymographs using FIJI software and a homemade plugin  
744 KymoTool (Ramirez-Rios et al., 2016). The tracks were detected from kymographs using “Detection  
745 plugin”. Briefly, kymograph images were enhanced by subtracting a blurred image and convolved for  
746 enhancement of continuous tracks. After thresholding, the detected tracks were skeletonized and the  
747 tracks composed of several molecules were cleaned manually.

748 Mean residence time was calculated by fitting the data points to a plateau followed by one-phase decay  
749 using GraphPad Prism 7. A precise determination of the residence time for some proteins (such as full-  
750 length VASH2-SVBP) was not possible in some experimental conditions and was therefore expressed as  
751 “superior to”. Indeed, the molecules were already attached to microtubules at the beginning of the TIRF  
752 movies and single molecule traces disappeared during movie acquisition. This latter observation was  
753 due to quenching of the sfGFP fluorophore, since at lower intensity of the excitation lamp we observed  
754 much longer binding events (not shown). However, at these lower lamp intensities, the signal-to-noise  
755 ratio was too low for correct analysis of binding characteristics.

756 Binding frequency calculations were determined by dividing the number of bindings events by the  
757 duration of the recording (in min) and by nanomolar VASH1/2-SVBP protein concentration over the  
758 microtubule size (in  $\mu\text{m}$ ).

759 For diffusion analysis, each track was interpolated with 1 pixel interval and (X, Y) coordinates were  
760 collected. The total displacement (sum of dX at each Y) was calculated, and the final displacement  
761 ( $X_{\text{final}} - X_0$ ) and time of binding ( $Y_{\text{final}} - Y_0$ ) were calculated. The displacement speed was then  
762 estimated as (total displacement in  $\mu\text{m}$ )/(binding time in seconds); thus, it included the displacement  
763 of the molecule in both microtubule directions.

764 For quantification of the surface covered by sfGFP (VASH-SVBP complexes) on microtubule, a binary  
765 image was produced for each kymograph. The kymograph was resliced to get a stack where different  
766 slices represent the time dimension. A maximal projection was generated and the percentage of the  
767 image covered by sfGFP was measured. After independently analyzing each kymograph, a scheme was  
768 created where each line represents the percentage of sfGFP signal covering on one microtubule.

769 The significance of difference among multiple groups was tested by non-parametric ANOVA with the  
770 Kruskal-Wallis test, and post-hoc pairwise comparisons were tested by the Dunn’s test except for  
771 **Figure 1C** where the Conover-Iman test was employed. For the interpretation of the p values, ‘ns’  
772 means there is no significant difference between the two distributions. \* means p value < 0.05, \*\*  
773 means p value < 0.01, \*\*\* means p value < 0.001, and \*\*\*\* mean p value < 0.0001. Data are generally  
774 represented as the median with the interquartile range.

775 **Data analysis of IF.** For measurement of tyrosinated- and detyrosinated tubulin (Tyr, deTyr) intensities  
776 FIIJ software was used. A mask was created by addition of the two channels, and each object in the  
777 image was saved as a region of interest (ROI). The mean intensity of ROIs was measured on each  
778 channel after background subtraction. In each experiment, the values were normalized to the median  
779 of the control without enzymes. Data analysis was then performed with GraphPad Prism 7. Statistical  
780 analyses were obtained using nonparametric one-way ANOVA assuming non-paired and non-Gaussian  
781 distribution (Kruskal-Wallis test). For the interpretation of the p values, ns means there is no significant  
782 difference between the two distributions, \*\* means p value < 0.01, and \*\*\*\* mean p value < 0.0001.  
783 Data are generally represented as the median with the interquartile range.

784

## 785 **ONLINE SUPPLEMENTAL MATERIAL**

786 **Figure S1.** Proteins used in the TIRF experiments.

787 **Figure S2.** Tubulin detyrosinating activity of sfGFP-tagged and untagged VASH-SVBP complexes and  
788 residence time analysis over the course of a TIRF experiment.

789 **Figure S3.** Cryo-EM data collection and processing.

790 **Figure S4.** Sequence alignments of VASHs.

791 **Figure S5.** Relative position of the catalytic site in microtubule-VASH1 and -VASH2 complexes with  
792 respect to the C-terminus of helix H12 of  $\alpha$ -tubulin.

793 **Video S1.** Interaction of single molecules of sfGFP-VASH1-SVBP (V1\_FL) with Taxol-stabilized  
794 microtubules enriched in tyrosinated HeLa tubulin. Scale bar, 2  $\mu$ m. **VASH1 complex exhibited short  
795 and frequent binding events, and diffused in both directions.**

796 **Video S2.** Interaction of single molecules of sfGFP-VASH2-SVBP (V2\_FL) with Taxol-stabilized  
797 microtubules enriched in tyrosinated HeLa tubulin. Scale bar, 2  $\mu$ m. **VASH2 complex bound less  
798 frequently, for much longer times, and diffused significantly less on microtubules than VASH1  
799 complex.**

800 **Video S3.** Interaction of single molecules of chimeric sfGFP-VASH1-SVBP complex bearing the N-  
801 terminal region of VASH2 (V1\_FL(NtV2)) with Taxol-stabilized microtubules enriched in tyrosinated  
802 HeLa tubulin. Scale bar, 2  $\mu$ m. The presence of the basic N-terminal region of VASH2-SVBP significantly  
803 changed the binding behavior of VASH1-SVBP. The chimeric complex showed much higher residence  
804 time and diffused poorly along the microtubule, resembling full length VASH2 complex.

805 **Video S4.** Interaction of single molecules of chimeric sfGFP-VASH2-SVBP complex bearing the N-  
806 terminal region of VASH1 (V2\_FL(NtV1)) with Taxol-stabilized microtubules enriched in tyrosinated  
807 HeLa tubulin. Scale bar, 2  $\mu$ m. The presence of the acidic N-terminal region of VASH1 strongly changed

808 the behavior of VASH2-SVBP, with shorter residence time and recovery of diffusion capacity,  
809 resembling full-length VASH1 complex.

810

## 811 **ACKNOWLEDGMENTS**

812

813 We would like to thank Isabelle Jacquier and Lisa De Macedo of Grenoble Institute Neuroscience (GIN)  
814 for technical help in preparation of proteins, Yasmina Saoudi of PIC-GIN for helping us with TIRF  
815 microscopy, and Benoît Decherf for the design of the FIJI software plugin for detection of single molecule  
816 tracks in the kymographs of TIRF experiments. We thank Yves Goldberg for the valuable discussion on  
817 statistics. Modified plasmid pETDUet-1 was a generous gift from Sandra Jeudy (IGS, Marseille). We thank  
818 the Electron Microscopy Facility (EMF) of the Paul Scherrer Institute and the BioEM Lab of the  
819 Biozentrum, University of Basel, for excellent access to cryo-electron microscopes.

820 This work was supported by the Leducq Foundation, Research grant n° 20CVD01 (to MJM), by Agence  
821 National de la Recherche (ANR), grant SPEED-Y n° ANR-20-CE16-0021 (to MJM), and ANR-20-CE13-0011,  
822 (to CJ), by the France Alzheimer grant 2023 (to MMM), by Institut National de la Santé et de la Recherche  
823 Médicale (INSERM), Centre National de la Recherche Scientifique (CNRS), and University Grenoble Alpes,  
824 and the Swiss National Science Foundation (SNSF), grant n° 310030\_192566 (to MOS). Part of the  
825 salaries of CS and SRR were from a collaborative program between Servier laboratories and MJM team.  
826 This work was supported by the Photonic Imaging Center of Grenoble Institute Neuroscience (PIC-GIN,  
827 Univ Grenoble Alpes – Inserm U1216) which is part of the ISdV core facility and certified by the IBISA  
828 label.

829

## 830 **Data deposition**

831 The cryo-EM electron density map and the structural model of the microtubule-VASH2-SVBP complex  
832 have been deposited in the Electron Microscopy Data Bank (EMD-14634) and the Protein Data Bank  
833 (PDB ID 7ZCW), respectively.

834

## 835 **AUTHOR CONTRIBUTIONS**

836 CB analyzed sequences. BB and CB designed and performed cloning experiments for the production of  
837 sfGFP-tagged proteins. SRR, CS, and SRC prepared recombinant proteins. SRR and CS conceived and  
838 performed single molecule TIRF experiments and assays of activity by immunofluorescence in  
839 reconstituted system and in cells. CS generally analyzed binding characteristics (TIRF), and SRR enzyme  
840 activity (immunofluorescence) and diffusion (TIRF). ED developed ImageJ macros for TIRF (diffusion)  
841 and immunofluorescence analysis, and helped in statistical analysis. FC started the TIRF project with

842 the help of JMS. VSM and IA provided essential advices for single molecule TIRF all along the project.  
843 SRR and CS produced, purified and labelled bovine brain tubulin with the help of IA and VSM. MMM  
844 and CJ generated and purified HeLa tyrosinated and detyrosinated tubulin. SRC prepared cryo-EM  
845 grids. TB collected cryo-EM data. TB and SRC processed and refined cryo-EM data. SRC modelled cryo-  
846 EM data. SRC and MOS performed structural analyses. MJM supervised the functional experiments.  
847 MOS supervised the structural experiments. MJM prepared Figures 1, 2, 5, 6, S1, S2, Tables 1, 3 and  
848 graphical abstract with the help of SRR and CS. SRC prepared Figures 3, 4, S3, S4, S5 and Table 2. SRR  
849 prepared Figure 7 and supplemental movies. MJM wrote the manuscript with contributions from all  
850 authors.

851

## 852 REFERENCES

- 853 Adamopoulos, A., L. Landskron, T. Heidebrecht, F. Tsakou, O.B. Bleijerveld, M. Altelaar, J. Nieuwenhuis,  
854 P.H.N. Celie, T.R. Brummelkamp, and A. Perrakis. 2019. Crystal structure of the tubulin tyrosine  
855 carboxypeptidase complex VASH1-SVBP. *Nat Struct Mol Biol.* 26:567-570.
- 856 Aillaud, C., C. Bosc, L. Peris, A. Bosson, P. Heemeryck, J. Van Dijk, J. Le Fric, B. Boulan, F. Vossier, L.E.  
857 Sanman, S. Syed, N. Amara, Y. Coute, L. Lafanechere, E. Denarier, C. Delphin, L. Pelletier, S.  
858 Humbert, M. Bogyo, A. Andrieux, K. Rogowski, and M.J. Moutin. 2017. Vasohibins/SVBP are  
859 tubulin carboxypeptidases (TCPs) that regulate neuron differentiation. *Science.* 358:1448-  
860 1453.
- 861 Aillaud, C., C. Bosc, Y. Saoudi, E. Denarier, L. Peris, L. Sago, N. Taulet, A. Cieren, O. Tort, M.M. Magiera,  
862 C. Janke, V. Redeker, A. Andrieux, and M.J. Moutin. 2016. Evidence for new C-terminally  
863 truncated variants of alpha- and beta-tubulins. *Mol Biol Cell.* 27:640-653.
- 864 Chen, C.Y., M.A. Caporizzo, K. Bedi, A. Vite, A.I. Bogush, P. Robison, J.G. Heffler, A.K. Salomon, N.A.  
865 Kelly, A. Babu, M.P. Morley, K.B. Margulies, and B.L. Prosser. 2018. Suppression of  
866 detyrosinated microtubules improves cardiomyocyte function in human heart failure. *Nat*  
867 *Med.* 24:1225-1233.
- 868 Chen, C.Y., A.K. Salomon, M.A. Caporizzo, S. Curry, N.A. Kelly, K. Bedi, A.I. Bogush, E. Kramer, S.  
869 Schlossarek, P. Janiak, M.J. Moutin, L. Carrier, K.B. Margulies, and B.L. Prosser. 2020. Depletion  
870 of Vasohibin 1 Speeds Contraction and Relaxation in Failing Human Cardiomyocytes. *Circ Res.*  
871 127:e14-e27.
- 872 Chen, J., E. Kholina, A. Szyk, V.A. Fedorov, I. Kovalenko, N. Gudimchuk, and A. Roll-Mecak. 2021. Alpha-  
873 tubulin tail modifications regulate microtubule stability through selective effector recruitment,  
874 not changes in intrinsic polymer dynamics. *Dev Cell.*

- 875 Chen, V.B., W.B. Arendall, 3rd, J.J. Headd, D.A. Keedy, R.M. Immormino, G.J. Kapral, L.W. Murray, J.S.  
876 Richardson, and D.C. Richardson. 2010. MolProbity: all-atom structure validation for  
877 macromolecular crystallography. *Acta Crystallogr D Biol Crystallogr.* 66:12-21.
- 878 Cook, A.D., S.W. Manka, S. Wang, C.A. Moores, and J. Atherton. 2020. A microtubule RELION-based  
879 pipeline for cryo-EM image processing. *J Struct Biol.* 209:107402.
- 880 Debs, G.E., M. Cha, X. Liu, A.R. Huehn, and C.V. Sindelar. 2020. Dynamic and asymmetric fluctuations  
881 in the microtubule wall captured by high-resolution cryoelectron microscopy. *Proc Natl Acad  
882 Sci U S A.* 117:16976-16984.
- 883 Dunn, S., E.E. Morrison, T.B. Liverpool, C. Molina-Paris, R.A. Cross, M.C. Alonso, and M. Peckham. 2008.  
884 Differential trafficking of Kif5c on tyrosinated and detyrosinated microtubules in live cells. *J  
885 Cell Sci.* 121:1085-1095.
- 886 Emsley, P., and K. Cowtan. 2004. Coot: model-building tools for molecular graphics. *Acta Crystallogr D  
887 Biol Crystallogr.* 60:2126-2132.
- 888 Erck, C., L. Peris, A. Andrieux, C. Meissirel, A.D. Gruber, M. Vernet, A. Schweitzer, Y. Saoudi, H. Pointu,  
889 C. Bosc, P.A. Salin, D. Job, and J. Wehland. 2005. A vital role of tubulin-tyrosine-ligase for  
890 neuronal organization. *Proc Natl Acad Sci U S A.* 102:7853-7858.
- 891 Ersfeld, K., J. Wehland, U. Plessmann, H. Dodemont, V. Gerke, and K. Weber. 1993. Characterization of  
892 the tubulin-tyrosine ligase. *J Cell Biol.* 120:725-732.
- 893 Janke, C., and M.M. Magiera. 2020. The tubulin code and its role in controlling microtubule properties  
894 and functions. *Nat Rev Mol Cell Biol.* 21:307-326.
- 895 Kumar, N., and M. Flavin. 1981. Preferential action of a brain detyrosinating carboxypeptidase on  
896 polymerized tubulin. *J Biol Chem.* 256:7678-7686.
- 897 Lafanechere, L., C. Courtay-Cahen, T. Kawakami, M. Jacrot, M. Rudiger, J. Wehland, D. Job, and R.L.  
898 Margolis. 1998. Suppression of tubulin tyrosine ligase during tumor growth. *J Cell Sci.* 111 ( Pt  
899 2):171-181.
- 900 Landskron, L., J. Bak, A. Adamopoulos, K. Kaplani, M. Moraiti, L.G. van den Hengel, J.Y. Song, O.B.  
901 Bleijerveld, J. Nieuwenhuis, T. Heidebrecht, L. Henneman, M.J. Moutin, M. Barisic, S. Taraviras,  
902 A. Perrakis, and T.R. Brummelkamp. 2022. Posttranslational modification of microtubules by  
903 the MATCAP detyrosinase. *Science*:eabn6020.
- 904 Li, F., Y. Hu, S. Qi, X. Luo, and H. Yu. 2019. Structural basis of tubulin detyrosination by vasohibins. *Nat  
905 Struct Mol Biol.* 26:583-591.
- 906 Li, F., Y. Li, X. Ye, H. Gao, Z. Shi, X. Luo, L.M. Rice, and H. Yu. 2020. Cryo-EM structure of VASH1-SVBP  
907 bound to microtubules. *Elife.* 9.

- 908 Liao, S., G. Rajendraprasad, N. Wang, S. Eibes, J. Gao, H. Yu, G. Wu, X. Tu, H. Huang, M. Barisic, and C.  
909 Xu. 2019. Molecular basis of vasohibins-mediated detyrosination and its impact on spindle  
910 function and mitosis. *Cell Res.* 29:533-547.
- 911 Liebschner, D., P.V. Afonine, M.L. Baker, G. Bunkoczi, V.B. Chen, T.I. Croll, B. Hintze, L.W. Hung, S. Jain,  
912 A.J. McCoy, N.W. Moriarty, R.D. Oeffner, B.K. Poon, M.G. Prisant, R.J. Read, J.S. Richardson,  
913 D.C. Richardson, M.D. Sammito, O.V. Sobolev, D.H. Stockwell, T.C. Terwilliger, A.G.  
914 Urzhumtsev, L.L. Videau, C.J. Williams, and P.D. Adams. 2019. Macromolecular structure  
915 determination using X-rays, neutrons and electrons: recent developments in Phenix. *Acta*  
916 *Crystallogr D Struct Biol.* 75:861-877.
- 917 Liu, X., H. Wang, J. Zhu, Y. Xie, X. Liang, Z. Chen, Y. Feng, and Y. Zhang. 2019. Structural insights into  
918 tubulin detyrosination by vasohibins-SVBP complex. *Cell Discov.* 5:65.
- 919 Lopes, D., and H. Maiato. 2020. The Tubulin Code in Mitosis and Cancer. *Cells.* 9(11):2356
- 920 Mastronarde, D.N. 2005. Automated electron microscope tomography using robust prediction of  
921 specimen movements. *J Struct Biol.* 152:36-51.
- 922 Moutin, M.J., C. Bosc, L. Peris, and A. Andrieux. 2021. Tubulin post-translational modifications control  
923 neuronal development and functions. *Dev Neurobiol.* 81:253-272.
- 924 Nicholls, R.A., M. Fischer, S. McNicholas, and G.N. Murshudov. 2014. Conformation-independent  
925 structural comparison of macromolecules with ProSMART. *Acta Crystallogr D Biol Crystallogr.*  
926 70:2487-2499.
- 927 Nieuwenhuis, J., A. Adamopoulos, O.B. Bleijerveld, A. Mazouzi, E. Stickel, P. Celie, M. Altelaar, P.  
928 Knipscheer, A. Perrakis, V.A. Blomen, and T.R. Brummelkamp. 2017. Vasohibins encode tubulin  
929 detyrosinating activity. *Science.* 358:1453-1456.
- 930 Nirschl, J.J., M.M. Magiera, J.E. Lazarus, C. Janke, and E.L. Holzbaur. 2016. Alpha-Tubulin Tyrosination  
931 and CLIP-170 Phosphorylation Regulate the Initiation of Dynein-Driven Transport in Neurons.  
932 *Cell Rep.* 14:2637-2652.
- 933 Peris, L., J. Parato, X. Qu, J.M. Soleilhac, F. Lante, A. Kumar, M.E. Pero, J. Martinez-Hernandez, C.  
934 Corrao, G. Falivelli, F. Payet, S. Gory-Faure, C. Bosc, M. Blanca Ramirez, A. Sproul, J. Brocard,  
935 B. Di Cara, P. Delagrance, A. Buisson, Y. Goldberg, M.J. Moutin, F. Bartolini, and A. Andrieux.  
936 2022. Tubulin tyrosination regulates synaptic function and is disrupted in Alzheimer's disease.  
937 *Brain.* Feb 11:awab436.
- 938 Peris, L., M. Thery, J. Faure, Y. Saoudi, L. Lafanechere, J.K. Chilton, P. Gordon-Weeks, N. Galjart, M.  
939 Bornens, L. Wordeman, J. Wehland, A. Andrieux, and D. Job. 2006. Tubulin tyrosination is a  
940 major factor affecting the recruitment of CAP-Gly proteins at microtubule plus ends. *J Cell Biol.*  
941 174:839-849.

- 942 Peris, L., M. Wagenbach, L. Lafanechere, J. Brocard, A.T. Moore, F. Kozielski, D. Job, L. Wordeman, and  
943 A. Andrieux. 2009. Motor-dependent microtubule disassembly driven by tubulin tyrosination.  
944 *J Cell Biol.* 185:1159-1166.
- 945 Pettersen, E.F., T.D. Goddard, C.C. Huang, G.S. Couch, D.M. Greenblatt, E.C. Meng, and T.E. Ferrin.  
946 2004. UCSF Chimera--a visualization system for exploratory research and analysis. *J Comput*  
947 *Chem.* 25:1605-1612.
- 948 Ramirez-Rios, S., E. Denarier, E. Prezel, A. Vinit, V. Stoppin-Mellet, F. Devred, P. Barbier, V. Peyrot, C.L.  
949 Sayas, J. Avila, L. Peris, A. Andrieux, L. Serre, A. Fourest-Lieuvin, and I. Arnal. 2016. Tau  
950 antagonizes end-binding protein tracking at microtubule ends through a phosphorylation-  
951 dependent mechanism. *Mol Biol Cell.* 27:2924-2934.
- 952 Ramirez-Rios, S., L. Serre, V. Stoppin-Mellet, E. Prezel, A. Vinit, E. Courriol, A. Fourest-Lieuvin, J.  
953 Delaroche, E. Denarier, and I. Arnal. 2017. A TIRF microscopy assay to decode how tau  
954 regulates EB's tracking at microtubule ends. *Methods Cell Biol.* 141:179-197.
- 955 Redeker, V. 2010. Mass spectrometry analysis of C-terminal posttranslational modifications of  
956 tubulins. *Methods Cell Biol.* 95:77-103.
- 957 Roll-Mecak, A. 2019. How cells exploit tubulin diversity to build functional cellular microtubule  
958 mosaics. *Curr Opin Cell Biol.* 56:102-108.
- 959 Roll-Mecak, A. 2020. The Tubulin Code in Microtubule Dynamics and Information Encoding. *Dev Cell.*  
960 54:7-20.
- 961 Sanchez-Pulido, L., and C.P. Ponting. 2016. Vasohibins: new transglutaminase-like cysteine proteases  
962 possessing a non-canonical Cys-His-Ser catalytic triad. *Bioinformatics.* 32:1441-1445.
- 963 Sanyal, C., N. Pietsch, S. Ramirez Rios, L. Peris, L. Carrier, and M.J. Moutin. 2021. The detyrosination/re-  
964 tyrosination cycle of tubulin and its role and dysfunction in neurons and cardiomyocytes.  
965 *Semin Cell Dev Biol.* Dec 16;S1084-9521(21)00314-1.
- 966 Scheres, S.H. 2012. RELION: implementation of a Bayesian approach to cryo-EM structure  
967 determination. *J Struct Biol.* 180:519-530.
- 968 Schrodinger, LLC. 2020. The PyMOL Molecular Graphics System, Version 2.0.
- 969 Schuldt, M., J. Pei, M. Harakalova, L.M. Dorsch, S. Schlossarek, M. Mokry, J.C. Knol, T.V. Pham, T.  
970 Schelfhorst, S.R. Piersma, C. Dos Remedios, M. Dalinghaus, M. Michels, F.W. Asselbergs, M.J.  
971 Moutin, L. Carrier, C.R. Jimenez, J. van der Velden, and D.W.D. Kuster. 2021. Proteomic and  
972 Functional Studies Reveal Detyrosinated Tubulin as Treatment Target in Sarcomere Mutation-  
973 Induced Hypertrophic Cardiomyopathy. *Circulation. Heart failure.* 14:e007022.
- 974 Souphron, J., S. Bodakuntla, A.S. Jijumon, G. Lakisic, A.M. Gautreau, C. Janke, and M.M. Magiera. 2019.  
975 Purification of tubulin with controlled post-translational modifications by polymerization-  
976 depolymerization cycles. *Nat Protoc.* 14:1634-1660.



- 977 Steinmetz, M.O., and A. Akhmanova. 2008. Capturing protein tails by CAP-Gly domains. *Trends*  
978 *Biochem Sci.* 33:535-545.
- 979 Stoppin-Mellet, V., N. Bagdadi, Y. Saoudi, and I. Arnal. 2020. Studying Tau-Microtubule Interaction  
980 Using Single-Molecule TIRF Microscopy. *Methods Mol Biol.* 2101:77-91.
- 981 Thiede, C., S. Lakamper, A.D. Wessel, S. Kramer, and C.F. Schmidt. 2013. A chimeric kinesin-1  
982 head/kinesin-5 tail motor switches between diffusive and processive motility. *Biophys J.*  
983 104:432-441.
- 984 Wang, N., C. Bosc, S. Ryul Choi, B. Boulan, L. Peris, N. Olieric, H. Bao, F. Krichen, L. Chen, A. Andrieux,  
985 V. Olieric, M.J. Moutin, M.O. Steinmetz, and H. Huang. 2019. Structural basis of tubulin  
986 detyrosination by the vasohibin-SVBP enzyme complex. *Nat Struct Mol Biol.* 26:571-582.
- 987 Yu, X., X. Chen, M. Amrute-Nayak, E. Allgeyer, A. Zhao, H. Chenoweth, M. Clement, J. Harrison, C.  
988 Doreth, G. Sirinakis, T. Krieg, H. Zhou, H. Huang, K. Tokuraku, D.S. Johnston, Z. Mallat, and X.  
989 Li. 2021. MARK4 controls ischaemic heart failure through microtubule detyrosination. *Nature.*  
990 594:560-565.
- 991 Zhang, K. 2016. Gctf: Real-time CTF determination and correction. *J Struct Biol.* 193:1-12.
- 992 Zheng, S.Q., E. Palovcak, J.P. Armache, K.A. Verba, Y. Cheng, and D.A. Agard. 2017. MotionCor2:  
993 anisotropic correction of beam-induced motion for improved cryo-electron microscopy. *Nat*  
994 *Methods.* 14:331-332.
- 995 Zhernov, I., S. Diez, M. Braun, and Z. Lansky. 2020. Intrinsically Disordered Domain of Kinesin-3 Kif14  
996 Enables Unique Functional Diversity. *Curr Biol.* 30:3342-3351 e3345.
- 997 Zhou, C., L. Yan, W.H. Zhang, and Z. Liu. 2019. Structural basis of tubulin detyrosination by VASH2/SVBP  
998 heterodimer. *Nat Commun.* 10:3212.
- 999
- 1000

1001 **TABLES**

1002

1003 **Table 1.** Binding parameters of VASH-SVBP complexes interaction with tyrosinated- and detyrosinated-  
1004 enriched microtubules in variable ionic strength media. **(A)** Related to Figure 1D-G. **(B)** Related to Figure  
1005 2A. **(C)** related to Figure 2B. **(D)** related to Figure 2C and 3CD. **(E)** related to Figures 3AB. A, B, C, D, E  
1006 represent experiments performed on different days. At least 15 microtubules were analyzed. See  
1007 Materials and Methods for detailed experimental conditions.

1008

1009 **Table 2.** Cryo-EM data collection, refinement, and structure validation.

1010

1011 **Table 3.** Binding parameters on microtubules of full-length, truncated, and chimeric versions of VASH1  
1012 and VASH2 enzymes in complex with SVBP. **(A)** Related to Figure 5DE. **(B, C)** Related to Figure 6AB. A, B  
1013 and C represent experiments performed on different days. At least 10 microtubules were analyzed. See  
1014 Materials and Methods for detailed experimental conditions.

1015

1016 **FIGURES**

1017

1018 **Figure 1. VASH1-SVBP and VASH2-SVBP complexes exhibit dissimilar microtubule detyrosination**  
1019 **activities and very different binding behaviors on microtubules. (A-C)** Comparison of the activity of  
1020 sfGFP-tagged VASH1-SVBP (V1\_FL) and VASH2-SVBP (V2\_FL) enzyme complexes (50 pM) on Taxol-  
1021 stabilized microtubules enriched in HeLa tyrosinated tubulin (Tyr-MTs) measured by  
1022 immunofluorescence in BRB40 supplemented with 50 mM KCl. **(A)** Representative images of  
1023 tyrosinated (Tyr, magenta) and detyrosinated (deTyr, green)  $\alpha$ -tubulin pools of microtubules after 30  
1024 min incubation in the absence (control) or presence of the indicated enzyme complexes. Scale bar, 10  
1025  $\mu$ m **(B)** Analysis of tyrosinated- and detyrosinated-tubulin signal intensity. Each point represents a  
1026 microtubule (at least 300 microtubules were analyzed). Data are represented as the median with the  
1027 interquartile range. Statistical significance was determined using Kruskal-Wallis test, \*\*\*\*p < 0.0001.  
1028 **(C)** Graphs of fluorescence intensity variations of tyrosinated (magenta) and detyrosinated (green)  
1029 tubulin on selected microtubules in the absence and presence of the enzyme. **(D-G)** TIRF microscopy  
1030 study of single molecules of sfGFP-tagged VASH1-SVBP (V1\_FL and deadV1\_FL) and VASH2-SVBP  
1031 (V2\_FL and deadV2\_FL) bound to microtubules in the same experimental conditions as in A-C. **(D)**  
1032 Representative kymographs. Scale bars: horizontal, 5  $\mu$ m; vertical, 5 s. Examples of TIRF movies for  
1033 active VASH1/2-SVBP from which kymographs were extracted are presented in supplemental data  
1034 ([Videos S1, S2](#)). **(E-G)** Analysis of the binding characteristics. Results for VASH1-SVBP are in blue and

1035 for VASH2-SVBP in orange, with plain circles for active enzymes (V1/2\_FL) and empty circles for their  
1036 catalytically dead versions (deadV1/2\_FL). **(E)** Representation of the microtubule surface covered with  
1037 VASH-SVBP molecules (white) or not covered (black) during the 45 s of a TIRF movie. Each horizontal  
1038 line represents a microtubule (at least 19 microtubules were analyzed). The red value corresponds to  
1039 the mean covering (in %). **(F)** Cumulative frequency of the residence times measured in TIRF movies  
1040 taken during the 30 min following addition of enzyme complexes to microtubules. The mean residence  
1041 time ( $\tau$ ) is obtained by fitting the curve with a mono-exponential function. **(G)** Analysis of binding  
1042 frequency. Each point represents a microtubule. **(H)** Analysis of diffusion. Each point represents a  
1043 single molecule, the molecules moving on at least 15 microtubules were analyzed. Data are  
1044 represented as the median with the interquartile range. Statistical significance was determined using  
1045 Kruskal-Wallis test. \* $p < 0.01$ , \*\*\* $p < 0.005$ , \*\*\*\* $p < 0.0001$ , and ns, not significant. Binding  
1046 characteristics are also summarized in [Table 1](#).

1047  
1048 **Figure 2. Ionic strength has a strong impact on the interaction of VASH-SVBP complexes with**  
1049 **microtubules, whereas tyrosinated-tubulin depletion disrupts less the interaction.**

1050 **(A-D)** Effect of ionic strength. Experiments were performed in the indicated buffers. Ionic strengths  
1051 are indicated in brackets in mM. **(A-C)** TIRF microscopy study. Representative kymographs of single  
1052 molecules of sfGFP-tagged VASH1-SVBP and VASH2-SVBP (V1\_FL, deadV1\_FL, V2\_FL and deadV2\_FL)  
1053 at the indicated concentrations bound to Taxol-stabilized microtubules enriched in HeLa tyrosinated  
1054 tubulin (Tyr-MTs). Scale bars: horizontal, 5  $\mu\text{m}$ ; vertical, 5 s. Binding characteristics are summarized in  
1055 [Table 1BCD](#). **(D)** Activity measurement by immunofluorescence. Analysis of tyrosinated signals  
1056 intensities after 30 min incubation in the absence (control) or presence of 50 pM enzymes. Each point  
1057 represents a microtubule (at least 150 microtubules were analyzed). Data are represented as the  
1058 median with the interquartile range. **(E-H)** Effect of decreasing tyrosinated tubulin. TIRF microscopy  
1059 study of single molecules of sfGFP-tagged VASH1-SVBP (V1\_FL and deadV1\_FL, 50 pM) and VASH2-  
1060 SVBP (V2\_FL and deadV2\_FL, 50 pM) bound to Taxol-stabilized microtubules enriched in HeLa  
1061 tyrosinated tubulin (Tyr-MTs) or detyrosinated tubulin (deTyr-MTs). Binding characteristics are  
1062 summarized in [Table 1](#). **(E, G)** Representative kymographs. Scale bars: horizontal, 5  $\mu\text{m}$ ; vertical, 5 s.  
1063 **(F, H)** Analysis of binding frequency. Each point represents a microtubule. At least 15 microtubules  
1064 were analyzed. Data are represented as the median with the interquartile range. Statistical significance  
1065 was determined using Kruskal-Wallis test. \* $p < 0.01$ , \*\* $p < 0.009$ , \*\*\* $p < 0.005$ , \*\*\*\* $p < 0.0001$ , and  
1066 ns, not significant.

1067  
1068 **Figure 3. Cryo-EM reconstruction of the microtubule-VASH2-SVBP complex reveals their interaction**  
1069 **sites. (A)** Electron density map of VASH2-SVBP (catalytically dead version of VASH2 carrying the

1070 Cys158Ala mutation) bound to a GMPCPP-stabilized microtubule. A map region of two laterally  
1071 associated  $\alpha\beta$ -tubulin dimers from two adjacent protofilaments bound to one VASH2-SVBP complex is  
1072 shown in two different orientations 90° apart. **(B)** Overview of the three microtubule-VASH2-SVBP  
1073 interacting sites from two different orientations 90° apart. Sites 1 and 2 involve the substrate  $\alpha$ -tubulin  
1074 while site 3 involves the  $\alpha'$ -tubulin subunit of an adjacent protofilament in the microtubule. All  
1075 molecules are displayed in cartoon representation. The white arrow close to site 2 in the lower panel  
1076 indicates the C-terminus of helix  $\alpha$ H12 and the black arrow denotes the facing direction of the  
1077 positively charged groove on VASH2. **(C)** Surface representation of the VASH2-SVBP structure with the  
1078 microtubule-binding residues highlighted in orange stick. Insets correspond to VASH2 and tubulin  
1079 residues implicated in the three interaction sites, displayed in stick representation and labeled in  
1080 orange and gray, respectively. The  $\alpha$ -tubulin,  $\beta$ -tubulin, VASH2, and SVBP molecules are shown in light  
1081 gray, dark gray, orange, and violet, respectively.

1082

1083 **Figure 4. Comparison between the microtubule-binding modes of VASH1-SVBP and VASH2-SVBP.**

1084 **(A)** Superimposition of the microtubule-VASH1-SVBP (PDB ID 6WSL, blue) and microtubule-VASH2-  
1085 SVBP (orange) structures reveals a 24° tilt between the two enzyme complexes. **(B)** Superimposing the  
1086 VASH2-SVBP structure (orange) onto the microtubule-bound VASH1-SVBP (blue) structure shows a  
1087 steric clash of Phe259 of the  $\beta$ 4- $\beta$ 5 loop of VASH2-SVBP with  $\alpha$ -tubulin. On the top, a sequence  
1088 alignment of the  $\beta$ 4- $\beta$ 5 loops of VASH1 and VASH2 is shown with proline residues highlighted in bold.  
1089 Phe259 of VASH2 and the corresponding Val270 of VASH1 are also highlighted in bold and are  
1090 underlined. **(C)** At site 3, VASH1-SVBP (blue) residues Arg234 and Leu303 form contacts with residues  
1091 Glu414 and Val159 of  $\alpha'$ -tubulin, respectively. In the case of VASH2-SVBP (orange), residues Arg291  
1092 and Met292 engage residues Glu414 and Tyr 108 of  $\alpha'$ -tubulin, respectively.

1093

1094 **Figure 5. The N- and C-terminal regions of VASH1 and VASH2 are crucial for their microtubule binding**

1095 **and detyrosination activity. (A, B)** Activity of enzyme complexes containing the sfGFP-tagged central  
1096 core domains of VASH1 and VASH2 with SVBP (V1\_CD and V2\_CD) bound to Taxol-stabilized  
1097 microtubules enriched in HeLa tyrosinated tubulin (Tyr-MTs) measured by immunofluorescence in TIRF  
1098 experimental conditions (50 pM enzyme, BRB80 or BRB40 supplemented with 50 mM KCl, TIRF  
1099 chamber). **(A)** Representative images of tyrosinated (Tyr, magenta) and deetyrosinated (deTyr, green)  
1100  $\alpha$ -tubulin pools of microtubules after 30 min in the absence (control) or presence of the enzyme's core  
1101 domains. Scale bar, 10  $\mu$ m **(B)** Analysis of tyrosinated and deetyrosinated tubulin signals intensity. Each  
1102 point represents a microtubule (at least 80 microtubules were analyzed). Data are represented as the  
1103 median. Statistical significance was determined using Kruskal-Wallis test, \*\*\*\*p < 0,001. **(C)** Schematic  
1104 representations of human VASH1 (blue) and VASH2 (orange) which are transglutaminase-like cysteine

1105 peptidases containing a triad of catalytic residues (Cys, His, and Leu). These proteins share 58% overall  
1106 sequence identity (74 % homology). Identities between core domains (CD, light colored boxes), and  
1107 between N- and C-terminal regions (Nt and Ct respectively, dark colored boxes) are specified on the  
1108 diagram. Isoelectric points (pI) of each domain are also provided. Residues numbers are indicated. **(D,**  
1109 **E)** TIRF microscopy study of single molecules of sfGFP-tagged catalytically dead versions of VASH1/2  
1110 full-length versions (dead V1\_FL and deadV2\_FL), core domains (deadV1\_CD and deadV2\_CD) and  
1111 truncated versions missing the flanking regions (deadV1\_Nt+CD, deadV1\_CD+Ct, deadV2\_Nt+CD,  
1112 deadV2\_CD+Ct) bound to Taxol-stabilized microtubules enriched in HeLa tyrosinated tubulin (Tyr-  
1113 MTs). Experiments were performed in the presence of 50 pM enzyme in BRB40 supplemented with 50  
1114 mM KCl. **(D)** Representative kymographs. Scale bars: horizontal, 5  $\mu\text{m}$ ; vertical, 5 s. **(E)** Analysis of  
1115 binding frequency. Each point represents a microtubule. Data are represented as the median with the  
1116 interquartile range. Statistical significance was determined using Kruskal-Wallis test. \*\*p < 0.002 \*\*\*p  
1117 < 0.0002, \*\*\*\*p < 0.0001, and ns, not significant. Results for VASH1-SVBP are in blue and for VASH2-  
1118 SVBP in orange.

1119  
1120 **Figure 6. The exchange of the N-terminal regions strongly alters binding behavior and activity of**  
1121 **VASH-SVBP enzyme complexes. (A-F)** Comparison of the interaction with Taxol-stabilized  
1122 microtubules enriched in HeLa tyrosinated tubulin (Tyr-MTs) of the sfGFP-tagged full length VASH1/2  
1123 enzymes (V1\_FL, V2\_FL) and chimeras in which the N-termini were exchanged (V1\_FL(NtV2),  
1124 V2\_FL(NtV1)). Both catalytically dead **(A, C, E)** and active **(B, D, F)** versions were studied. Experiments  
1125 were performed in the presence of 50 pM enzyme in BRB40 supplemented with 50 mM KCl. **(A, B)**  
1126 Representative kymographs. Scale bars: horizontal, 5  $\mu\text{m}$ ; vertical, 5 s. Examples of TIRF movies from  
1127 which kymographs were extracted are presented in supplemental data for the chimeras ([Videos S3,](#)  
1128 [S4](#)). Binding characteristics are summarized in [Table 3](#). **(C, D)** Analysis of diffusion. Each point  
1129 represents a single molecule, the molecules moving on at least 17 microtubules were analyzed. **(E, F)**  
1130 Representation of the microtubule surface covered with VASH-SVBP molecules (white) or not covered  
1131 (black) during the 45 s of TIRF movies. Each horizontal line represents a microtubule (at least 17  
1132 microtubules were analyzed). The red value corresponds to the mean covering (in %). **(G-H)** Activity of  
1133 VASH-SVBP enzyme complexes and chimeras on Tyr-MTs measured by immunofluorescence in the  
1134 same experimental conditions (50 pM enzyme, BRB40 supplemented with 50 mM KCl, TIRF chamber).  
1135 **(G)** Representative images of tyrosinated (Tyr, magenta) and detyrosinated (deTyr, green)  $\alpha$ -tubulin  
1136 pools of microtubules after 30 min incubation in the absence (control) or presence of the indicated  
1137 enzyme. Scale bar, 10  $\mu\text{M}$  **(H)** Analysis of tyrosinated- and detyrosinated-tubulin signals intensities.  
1138 Each point represents a microtubule (at least 200 microtubules were analyzed). Data are represented  
1139 as the median. Statistical significance was determined using Kruskal-Wallis test, \*\*\*\*p < 0.0001.

1140

1141 **Figure 7. VASH1-SVBP and VASH2-SVBP generate different detyrosination profiles in fibroblast cells.**

1142 Cultured murine embryonic fibroblasts (MEFs) were permeabilized in BRB80 supplemented with Triton

1143 X-100 and glycerol, incubated 30 min with recombinant enzymes (50 or 200 pM, as indicated), fixed in

1144 methanol at -20°C and labeled with anti-tyrosinated (Tyr, magenta) and anti-detyrosinated (deTyr,

1145 green) tubulin antibodies to reveal detyrosination/tyrosination levels on microtubules. Scale bar, 10

1146  $\mu\text{m}$ .

Table 1. **Binding parameters of VASH-SVBP complexes interaction with tyrosinated- and detyrosinated-enriched microtubules in variable ionic strength media.**

| Experiment (medium)         | Ionic strength (mM) | Microtubule | Recombinant protein (concentration) | Residence time $\tau$ (s) | Binding frequency ( $\text{min}^{-1} \cdot \text{nM}^{-1} \cdot \mu\text{m}^{-1}$ ) |
|-----------------------------|---------------------|-------------|-------------------------------------|---------------------------|-------------------------------------------------------------------------------------|
| <b>A</b> (BRB40, 50 mM KCl) | 140                 | Tyr-MTs     | V1_FL (50 pM)                       | 0.5                       | 80.8                                                                                |
|                             |                     | Tyr-MTs     | deadV1_FL (50 pM)                   | 1.0                       | 132.2                                                                               |
|                             |                     | Tyr-MTs     | V2_FL (50 pM)                       | >11                       | 13.0                                                                                |
|                             |                     | Tyr-MTs     | deadV2_FL (50 pM)                   | >14.6                     | 13.9                                                                                |
| <b>B</b> (BRB80)            | 173                 | Tyr-MTs     | V1_FL (50 pM)                       | 0.8                       | 51.6                                                                                |
|                             |                     | Tyr-MTs     | deadV1_FL (50 pM)                   | 0.9                       | 86.4                                                                                |
| <b>C</b> (BRB40, 50 mM KCl) | 223                 | Tyr-MTs     | V1_FL (1 nM)                        | 0.2                       | 3.0                                                                                 |
|                             |                     | Tyr-MTs     | deadV1_FL (1 nM)                    | 0.2                       | 12.7                                                                                |
|                             |                     | Tyr-MTs     | V2_FL (100 pM)                      | 3.9                       | 20.4                                                                                |
|                             |                     | Tyr-MTs     | deadV2_FL (100 pM)                  | >7.2                      | 13.5                                                                                |
| <b>D</b> (BRB40, 50 mM KCl) | 273                 | Tyr-MTs     | V2_FL (50 pM)                       | 0.9                       | 14.9                                                                                |
|                             |                     | Tyr-MTs     | deadV2_FL (50 pM)                   | 1.4                       | 19.3                                                                                |
|                             |                     | deTyr-MTs   | V2_FL (50 pM)                       | 0.6                       | 13.7                                                                                |
|                             |                     | deTyr-MTs   | deadV2_FL (50 pM)                   | 0.7                       | 41.0                                                                                |
| <b>E</b> (BRB40, 50 mM KCl) | 140                 | Tyr-MTs     | V1_FL (50 pM)                       | 0.8                       | 53.4                                                                                |
|                             |                     | Tyr-MTs     | deadV1_FL (50 pM)                   | 1.2                       | 89.0                                                                                |
|                             |                     | deTyr-MTs   | V1_FL (50 pM)                       | 0.5                       | 42.3                                                                                |
|                             |                     | deTyr-MTs   | deadV1_FL (50 pM)                   | 0.6                       | 66.5                                                                                |

**(A)** Related to Figure 1D-G. **(B)** Related to Figure 2A. **(C)** related to Figure 2B. **(D)** related to Figure 2C and 3CD. **(E)** related to Figures 3AB. **(A-E)** represent experiments performed on different days. At least 15 microtubules were analyzed. See Materials and Methods for detailed experimental conditions. BRB40, 40 mM Pipes-KOH at pH 6.8, 1 mM MgCl<sub>2</sub>, 1 mM EGTA. BRB80, 80 mM Pipes-KOH at pH 6.8, 1 mM MgCl<sub>2</sub>, 1 mM EGTA. Tyr-MTs, microtubules enriched in HeLa tyrosinated tubulin. deTyr-MTs, microtubules enriched in HeLa detyrosinated tubulin.



Table 2. Cryo-EM data collection, refinement, and structure validation.

| <b>Data collection</b>                              | <b>Microtubule-VASH2-SVBP</b> |
|-----------------------------------------------------|-------------------------------|
| Magnification                                       | 47,260x                       |
| Pixel size (Å)                                      | 1.058                         |
| Defocus Range (µm)                                  | -0.6 to -2.2                  |
| Voltage (kV)                                        | 300                           |
| Exposure time (s per frame)                         | 0.2                           |
| Number of frames                                    | 45                            |
| Total dose (e/Å <sup>2</sup> )                      | 65                            |
| <b>Reconstitution</b>                               |                               |
| Box size (pixels)                                   | 600                           |
| Inter-box distance (Å)                              | 82                            |
| Asymmetrical units                                  | 1                             |
| Micrographs                                         | 3,345                         |
| Picked filaments                                    | 8,988                         |
| Initial extracted segments                          | 153,041                       |
| Segments after 3D classification                    | 96,922                        |
| Resolution after 3D auto-refine (Å)                 | 3.6                           |
| Final overall resolution (Å)                        | 3.2                           |
| Estimated map sharpening B-factor (Å <sup>2</sup> ) | -54.76                        |
| Helical rise (Å)                                    | 8.99                          |
| Helical twist (°)                                   | -25.73                        |
| <b>Atomic model</b>                                 |                               |
| R.m.s. deviations                                   |                               |
| Bond lengths (Å)                                    | 0.005                         |
| Bond angles (°)                                     | 0.835                         |
| <b>Validation</b>                                   |                               |
| Map CC (mask)                                       | 0.80                          |
| MolProbity clashscore                               | 3.36                          |
| Overall score                                       | 1.42                          |
| Rotamer outliers (%)                                | 0.21                          |
| <b>Ramachandran plot</b>                            |                               |
| Favored (%)                                         | 96.09                         |
| Allowed (%)                                         | 3.91                          |
| Outliers (%)                                        | 0.00                          |

Table 3. **Binding parameters on microtubules of full-length, truncated, and chimeric versions of VASH1 and VASH2 enzymes in complex with SVBP.**

| Experiment (medium)         | Ionic strength (mM) | Microtubule | Recombinant protein (concentration) | Residence time $\tau$ (s) | Binding frequency ( $\text{min}^{-1} \cdot \text{nM}^{-1} \cdot \mu\text{m}^{-1}$ ) |
|-----------------------------|---------------------|-------------|-------------------------------------|---------------------------|-------------------------------------------------------------------------------------|
| <b>A</b> (BRB40, 50 mM KCl) | 140                 | Tyr-MTs     | deadV1_FL (50 pM)                   | 1.2                       | 80.4                                                                                |
|                             |                     |             | deadV1_Nt+CD (50 pM)                | -                         | No binding                                                                          |
|                             |                     |             | deadV1_CD (50 pM)                   | 1.4                       | 70.7                                                                                |
|                             |                     |             | deadV1_CD+Ct (50 pM)                | >7.7                      | 21.1                                                                                |
|                             |                     |             | deadV2_FL (50 pM)                   | >17.1                     | 16.2                                                                                |
|                             |                     |             | deadV2_Nt+CD (50 pM)                | >4.0                      | 35.9                                                                                |
|                             |                     |             | deadV2_CD (50 pM)                   | 1.2                       | 85.1                                                                                |
|                             |                     |             | deadV2_CD+Ct (50 pM)                | >10.4                     | 10.4                                                                                |
| <b>B</b> (BRB40, 50 mM KCl) | 140                 | Tyr-MTs     | deadV1_FL (50 pM)                   | 1.2                       | 54.1                                                                                |
|                             |                     |             | deadV1_FL(NtV2) (50 pM)             | >9.9                      | 31.0                                                                                |
|                             |                     |             | deadV2_FL (50 pM)                   | >13.4                     | 19.1                                                                                |
|                             |                     |             | deadV2_FL(NtV1) (50 pM)             | >6.5                      | 18.1                                                                                |
| <b>C</b> (BRB40, 50 mM KCl) | 140                 | Tyr-MTs     | V1_FL (25 pM)                       | 1.2                       | 96.7                                                                                |
|                             |                     |             | V1_FL(NtV2) (25 pM)                 | >10.7                     | 20.8                                                                                |
|                             |                     |             | V2_FL (25 pM)                       | >12.9                     | 22.9                                                                                |
|                             |                     |             | V2_FL(NtV1) (25 pM)                 | >3.9                      | 42.4                                                                                |

**(A)** Related to Figure 6DE. **(B, C)** Related to Figure 7AB. A, B and C represent experiments performed on different days. At least 10 microtubules were analyzed. See Materials and Methods for detailed experimental conditions.

Figure 1

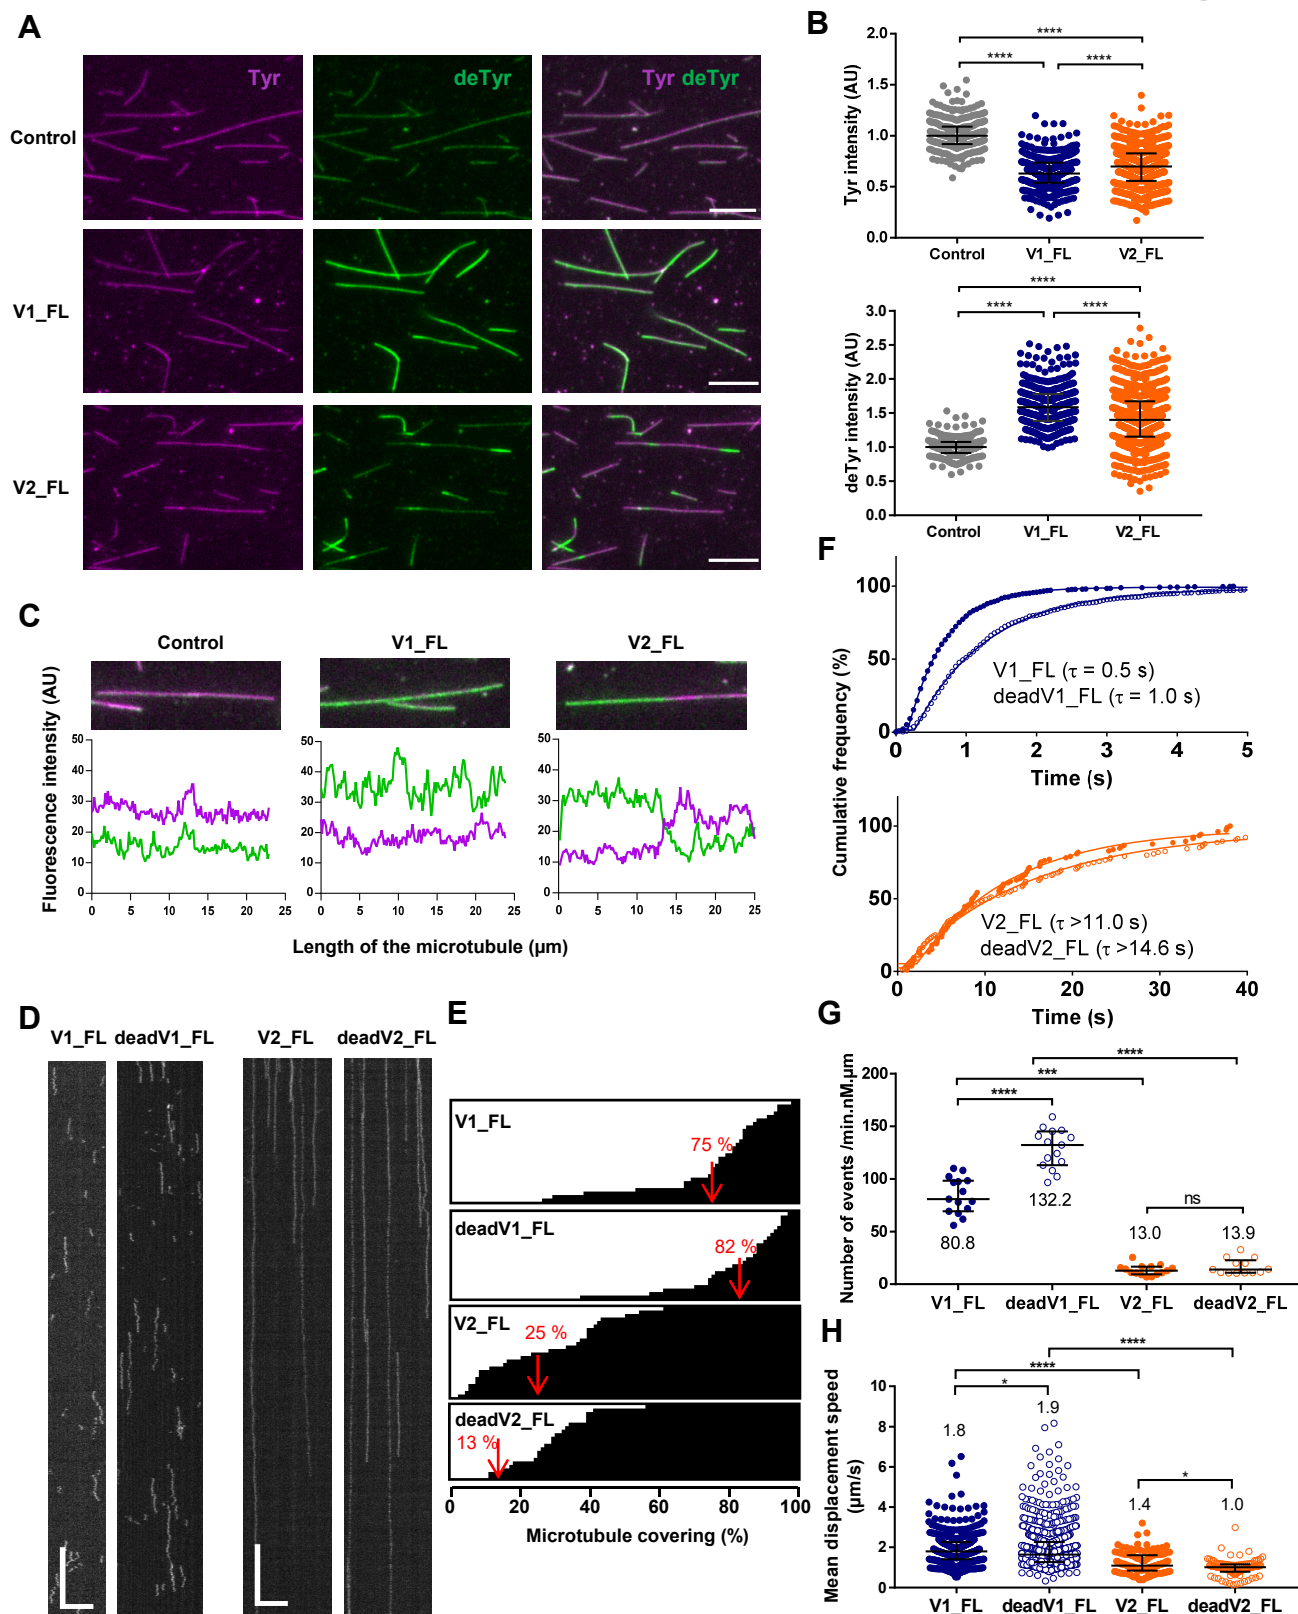

Figure 2

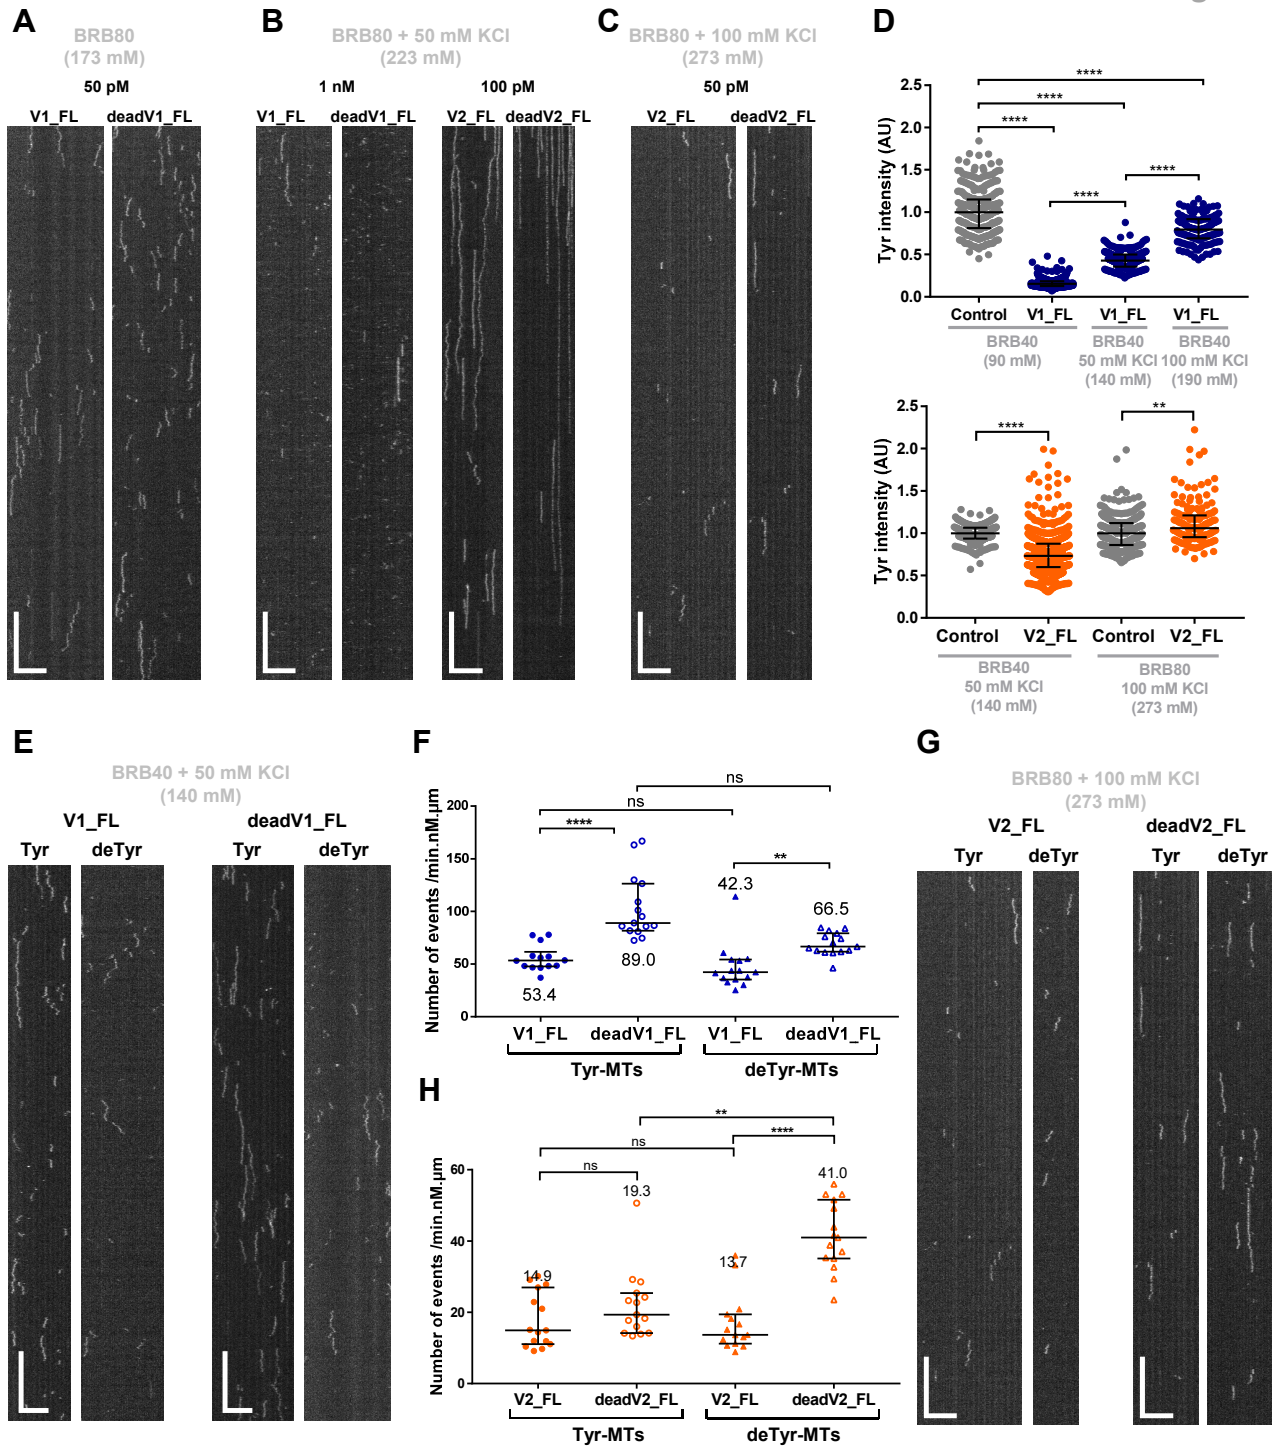



Figure 3

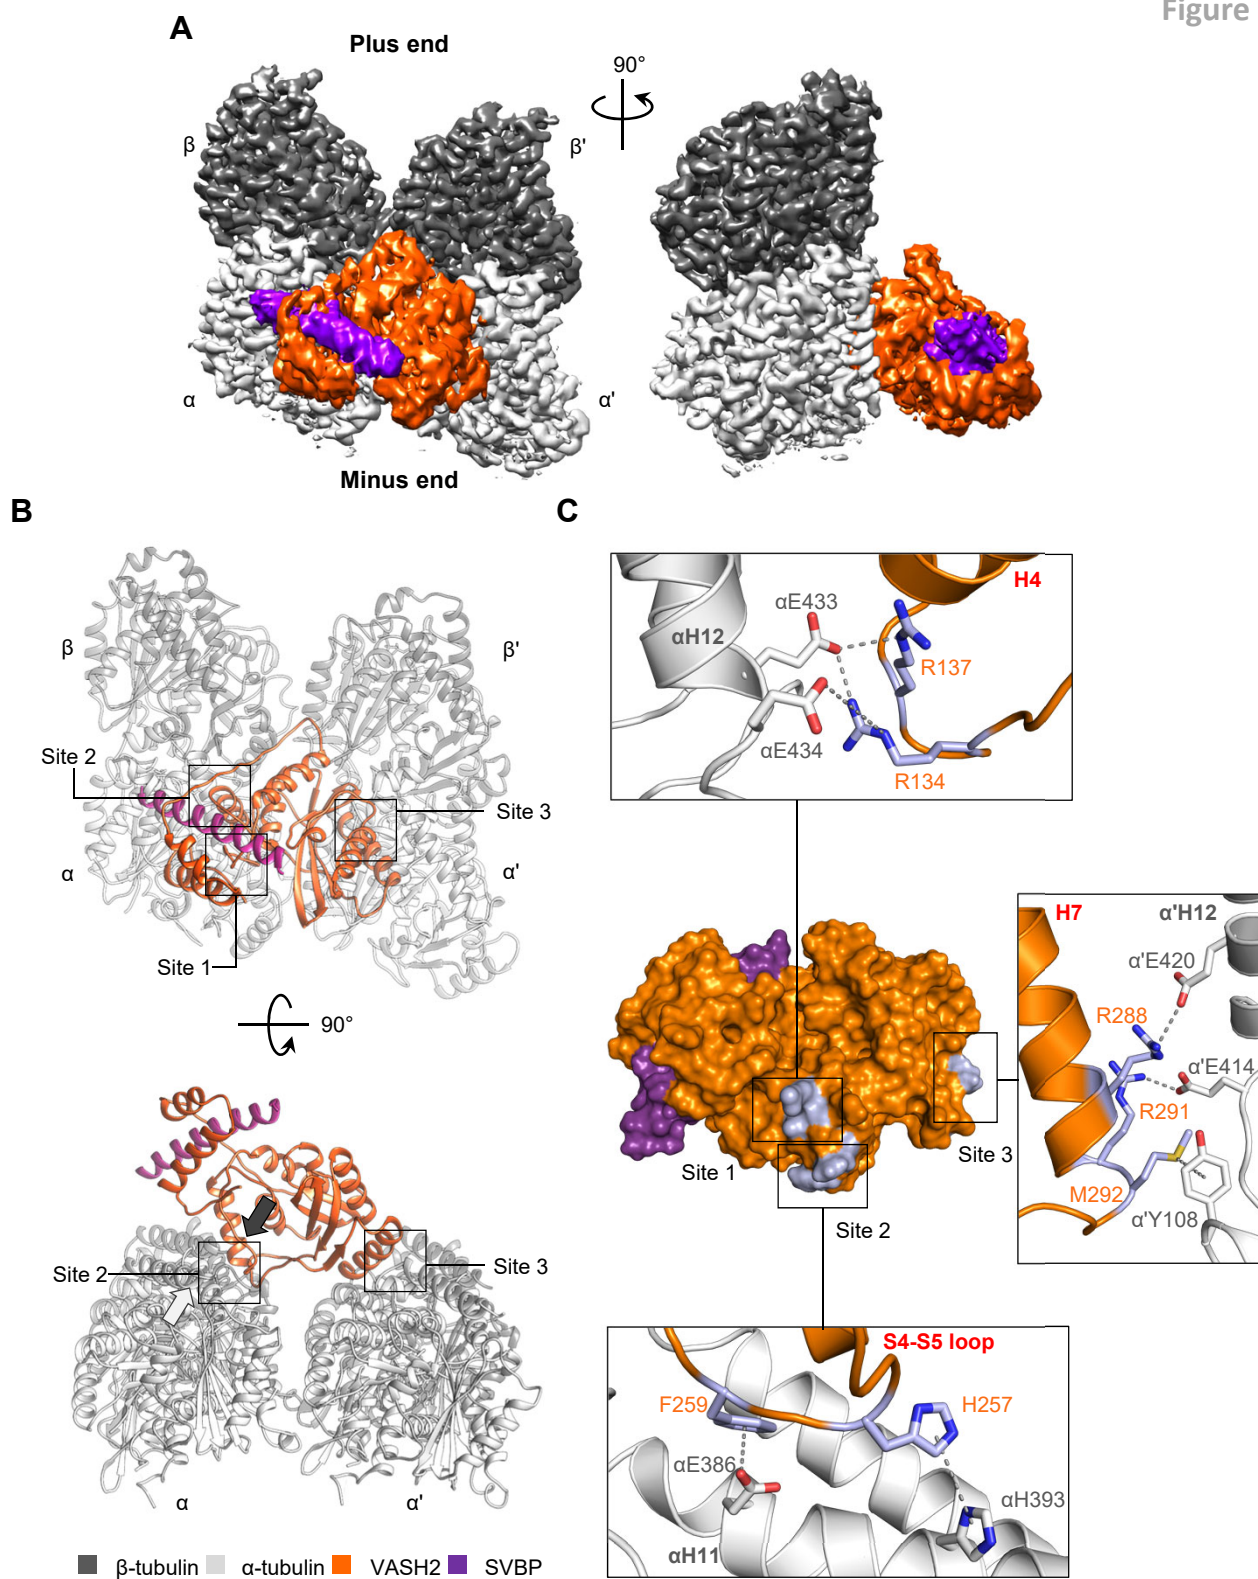

Figure 4

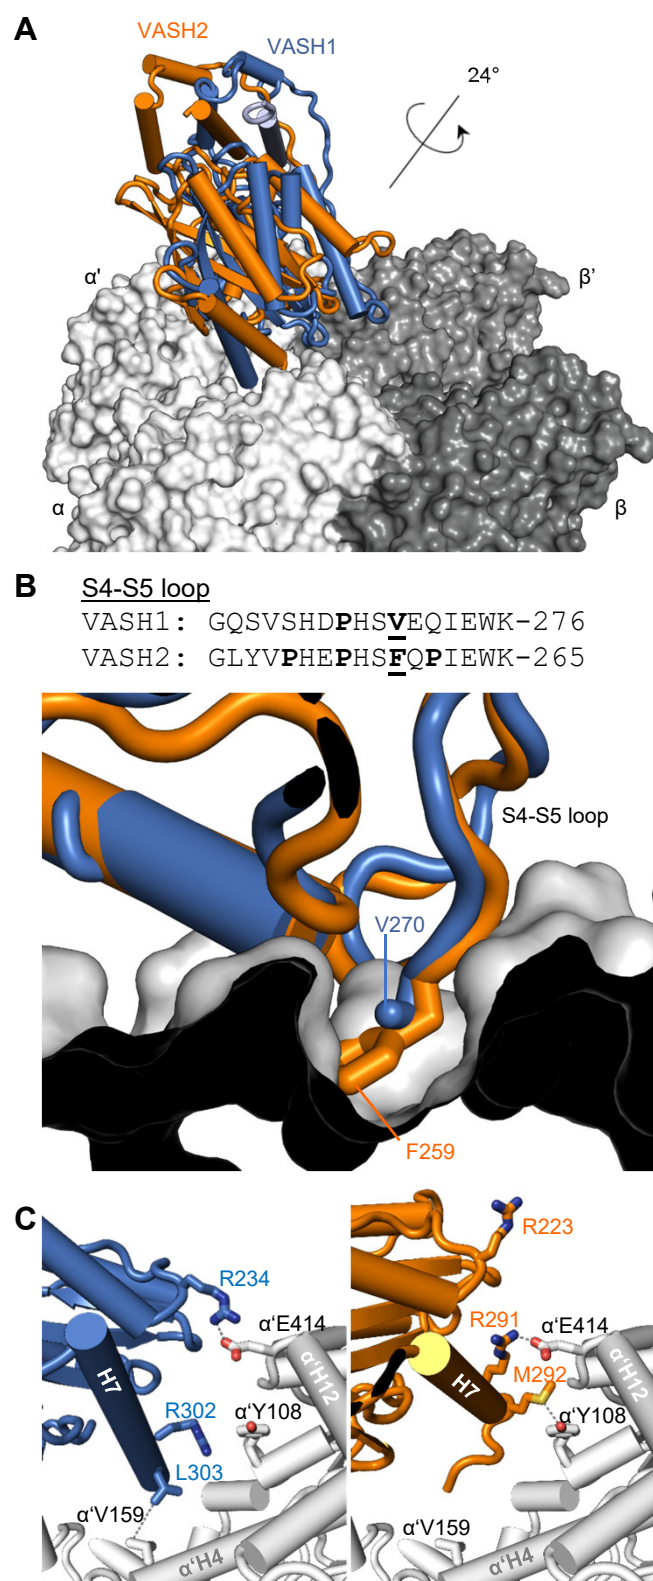



Figure 5

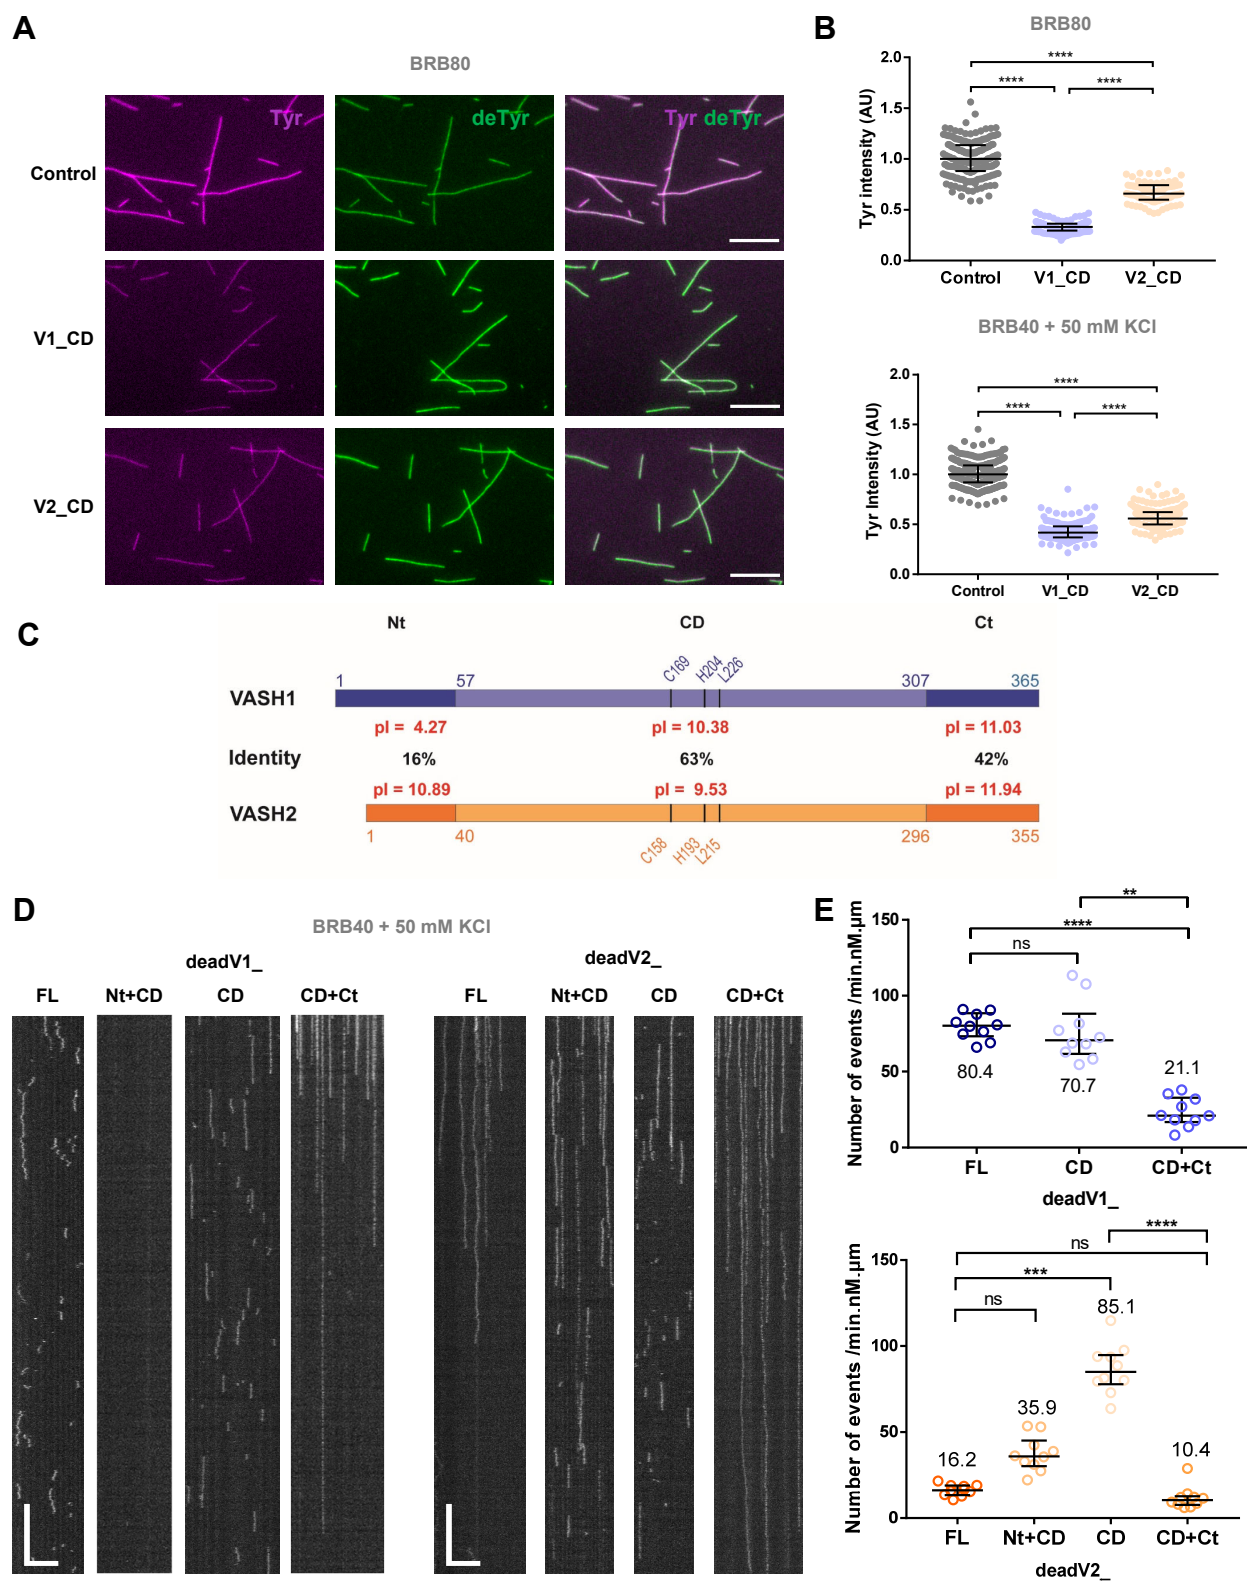

Figure 6

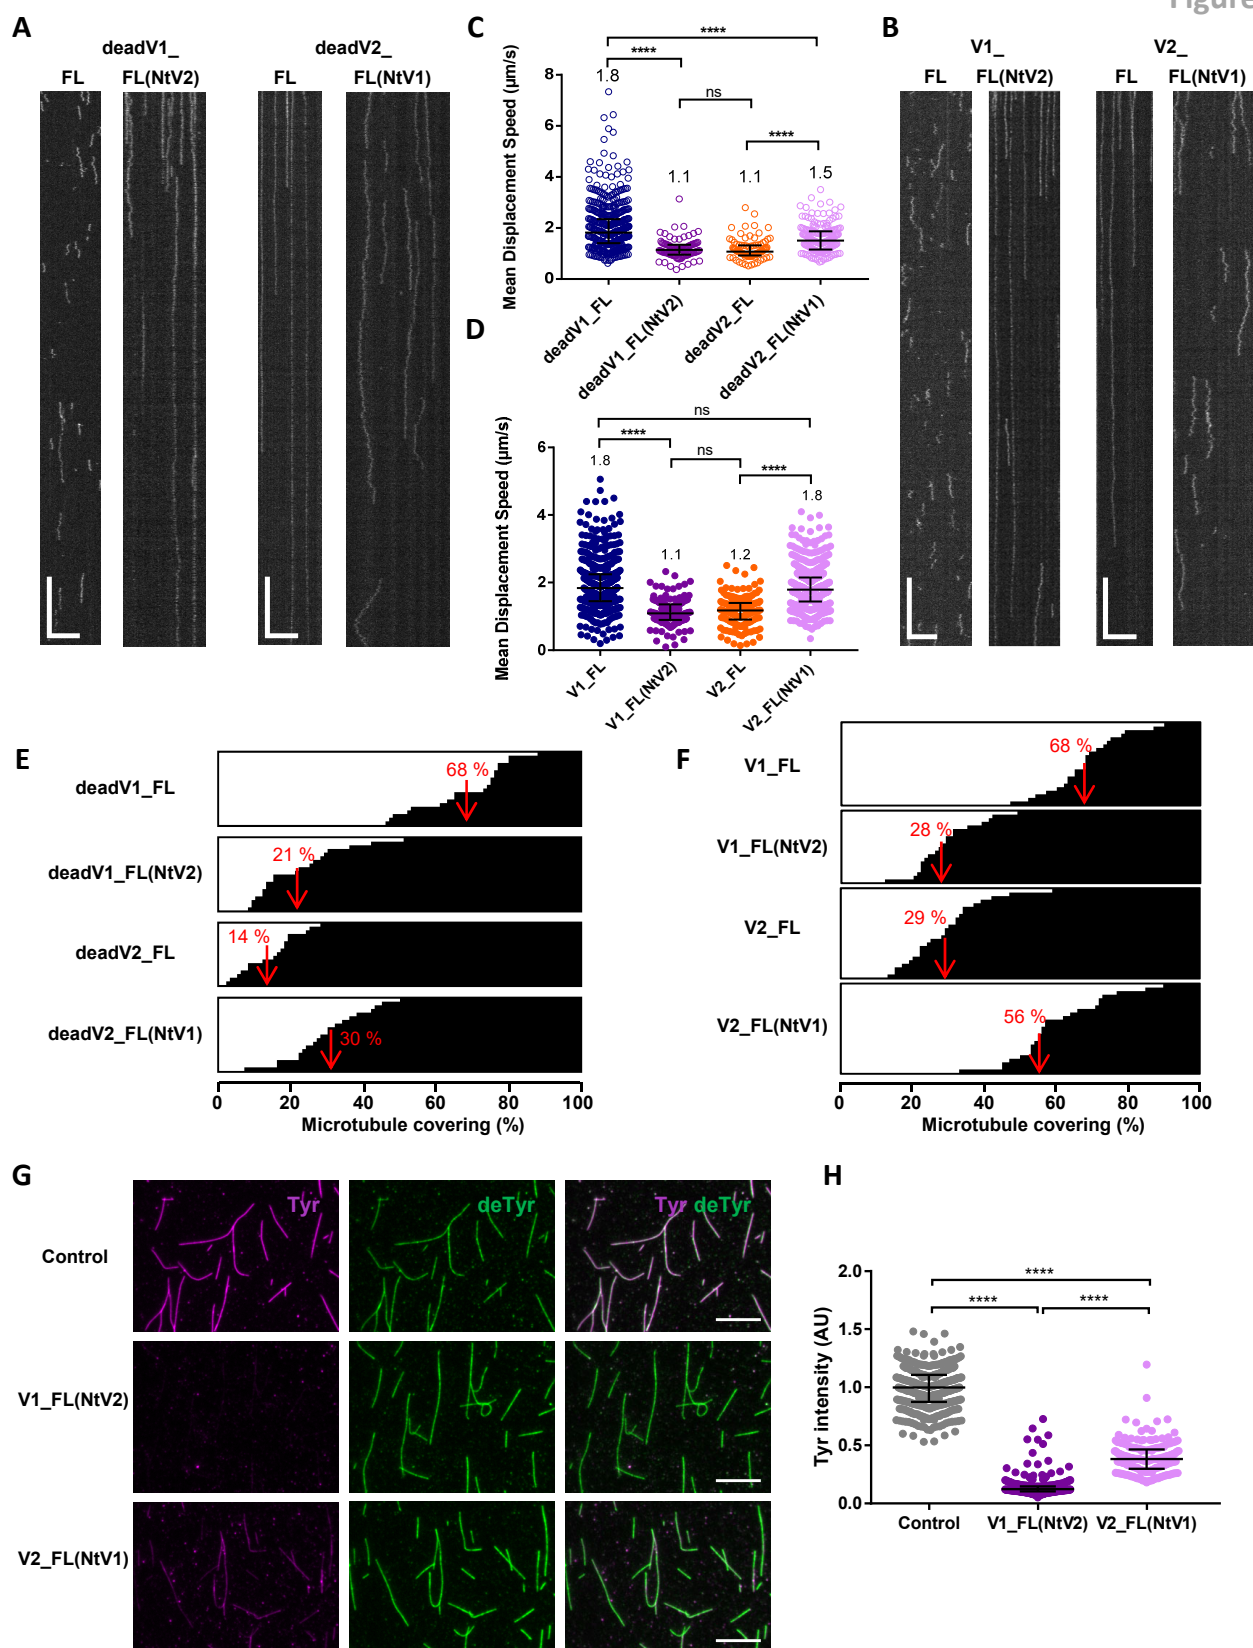

Figure 7

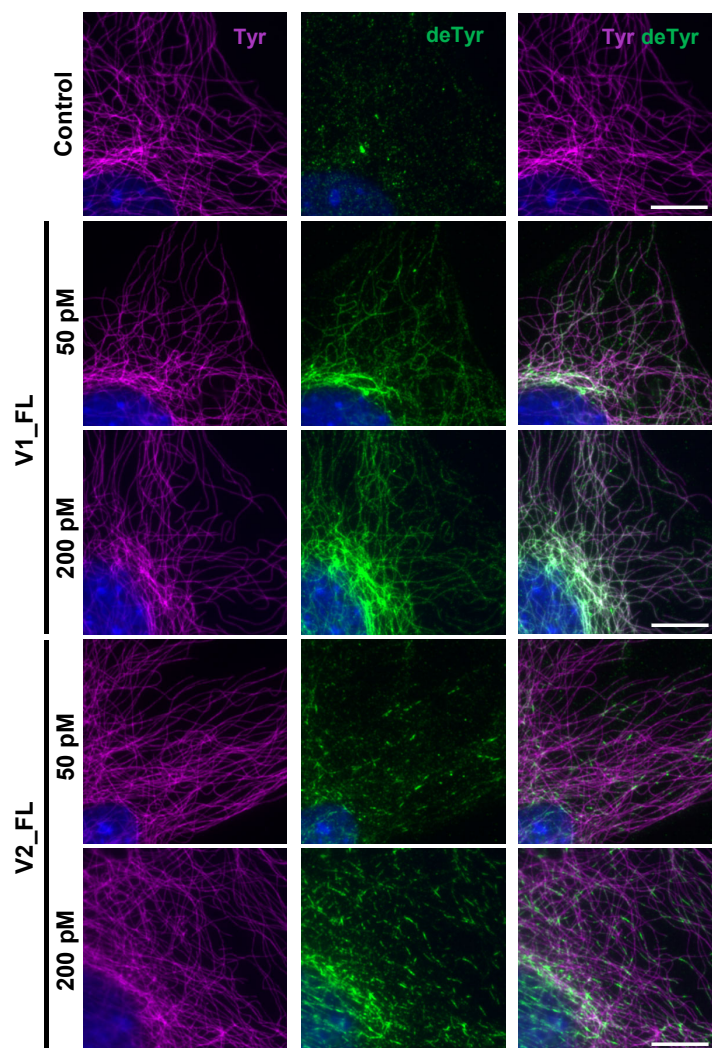

Source: https://www.biorxiv.org/content/biorxiv/early/2022/06/03/2022.06.02.494516.full.pdf
